# Supplementary material for: Rtf1-dependent transcriptional pausing regulates cardiogenesis
Source: bioRxiv preprint, doi:10.1101/2023.10.13.562296, version 2 (2025-10-29)
Supplement: Supplementary Data File 1 [file 562296_file02.xlsx]

## Sheet: hand2_DESEq2
gene	baseMean	log2FoldChange	lfcSE	stat	pvalue	padj
notum1b	677.627	4.65222	0.215153	21.6229	1.09367e-103	1.19014e-99
isl2b	245.962	-4.07646	0.249573	-16.3338	5.67737e-60	3.08906e-56
si:ch211-51e12.7	3971.92	-1.60677	0.100936	-15.9187	4.70354e-57	1.70613e-53
zgc:55733	727.407	-3.89528	0.249198	-15.6312	4.46103e-55	1.21362e-51
mef2ca	1134.14	-3.28587	0.225599	-14.5651	4.68618e-48	1.0199e-44
sema3e	1420.66	-4.1568	0.288384	-14.4141	4.21698e-47	7.6482e-44
pcolcea	1294.94	-2.7158	0.197359	-13.7607	4.39005e-43	6.82465e-40
cntfr	958.6	-3.01648	0.223476	-13.498	1.60709e-41	2.00303e-38
tnnt2a	436.822	-4.05474	0.300446	-13.4957	1.65661e-41	2.00303e-38
entpd1	906.256	-3.8259	0.283923	-13.4751	2.19055e-41	2.38376e-38
plod2	283.168	-4.15584	0.3214	-12.9304	3.03202e-38	2.99949e-35
rbfox1l	352.057	-6.28382	0.489074	-12.8484	8.7797e-38	7.96173e-35
myoc	1434.79	-2.00438	0.157128	-12.7563	2.87411e-37	2.40585e-34
tdgf1	3456.61	-1.84903	0.15655	-11.8111	3.42079e-32	2.65893e-29
emilin1a	167.957	-3.54171	0.301559	-11.7447	7.52007e-32	5.45556e-29
smad3a	320.774	-2.22243	0.190025	-11.6955	1.34462e-31	9.14508e-29
matn4	650.005	-3.40209	0.291429	-11.6738	1.73454e-31	1.11031e-28
jam2b	592.29	-2.8672	0.248716	-11.528	9.53076e-31	5.76187e-28
pgam5	1005.55	-1.65009	0.143561	-11.494	1.41483e-30	8.10325e-28
hoxc3a	624.45	-2.67805	0.234344	-11.4278	3.03536e-30	1.65154e-27
wnt2bb	135.974	-3.12599	0.27804	-11.243	2.50779e-29	1.29951e-26
htr5al	218.924	2.52162	0.229327	10.9958	4.00519e-28	1.98111e-25
mef2cb	486.331	-2.33043	0.213951	-10.8923	1.2539e-27	5.93257e-25
sele	196.462	-2.81283	0.264134	-10.6492	1.75789e-26	7.97055e-24
zbtb16a	1711.15	-1.95781	0.184573	-10.6073	2.75682e-26	1.19999e-23
nkx2.5	634.76	-3.95406	0.372899	-10.6036	2.86747e-26	1.20015e-23
arl4ab	426.86	2.1278	0.201023	10.5849	3.50226e-26	1.41154e-23
fgf10a	410.233	-2.19078	0.208848	-10.4898	9.62028e-26	3.73885e-23
rdh10a	2449.57	-1.49346	0.142597	-10.4733	1.14624e-25	4.30116e-23
palm1b	474.4	-2.50585	0.239343	-10.4697	1.19003e-25	4.31665e-23
ved	1697.06	2.10321	0.201409	10.4425	1.58661e-25	5.5695e-23
raraa	1371.78	-1.42812	0.136901	-10.4317	1.7761e-25	6.03984e-23
atp2a2a	992.211	-3.19307	0.309668	-10.3113	6.26557e-25	2.06612e-22
hnrpdl	1694.06	-1.35663	0.133151	-10.1886	2.22838e-24	7.13211e-22
mppe1	139.725	-2.63818	0.260521	-10.1266	4.21174e-24	1.30949e-21
shisa3	376.678	-3.03764	0.30039	-10.1123	4.87269e-24	1.47291e-21
kif23	2876.36	1.12625	0.112953	9.97096	2.04242e-23	6.00693e-21
meis1a	431.258	-1.88761	0.191141	-9.8755	5.31667e-23	1.52253e-20
unc45b	644.042	-3.30101	0.337439	-9.78253	1.33818e-22	3.73385e-20
odc1	4726.25	1.41818	0.146528	9.67859	3.71821e-22	1.01154e-19
mtus1a	98.0297	-6.4893	0.671818	-9.65931	4.48857e-22	1.19133e-19
cxcl12b	6512.23	-1.32076	0.137194	-9.6269	6.15595e-22	1.59498e-19
bmp2b	479.588	1.5265	0.161	9.48138	2.50931e-21	6.35031e-19
dld	221.64	-3.82027	0.408884	-9.34315	9.35074e-21	2.31261e-18
tspan18a	93.345	-3.08174	0.330974	-9.31111	1.26501e-20	3.05907e-18
atoh8	187.22	2.05589	0.221956	9.26256	1.99585e-20	4.72149e-18
hoxc11a	67.0068	-6.14221	0.665361	-9.23141	2.67101e-20	6.18424e-18
tpst1	990.218	-1.1924	0.12948	-9.20914	3.28757e-20	7.43487e-18
gdf6a	249.46	-2.92192	0.317352	-9.20719	3.34781e-20	7.43487e-18
cldng	74.8696	-3.13583	0.343221	-9.13649	6.45113e-20	1.40402e-17
pou3f3b	117.743	-5.94768	0.654643	-9.08538	1.03336e-19	2.2049e-17
podxl	3693.98	-2.31596	0.257903	-8.97999	2.70782e-19	5.66664e-17
mrps10	427.144	-1.44411	0.162459	-8.88911	6.16009e-19	1.2648e-16
si:ch211-69g19.2	1977.32	1.17218	0.132681	8.83456	1.00495e-18	2.02516e-16
aurkb	2340.44	1.05518	0.120348	8.76777	1.82234e-18	3.60559e-16
luc7l3	2139.32	1.07111	0.122645	8.73346	2.47003e-18	4.7998e-16
rbpms2a	1257	-1.43448	0.164661	-8.71171	2.99319e-18	5.71436e-16
tmed1a	194.081	-2.61946	0.303559	-8.62917	6.18004e-18	1.1595e-15
fbln1	1685.05	-2.17333	0.255083	-8.52008	1.59438e-17	2.94069e-15
twsg1b	167.649	2.09129	0.247492	8.44993	2.91467e-17	5.28625e-15
kif2c	1727.68	1.18974	0.141114	8.43108	3.42477e-17	6.10956e-15
chsy1	1613.19	-1.58682	0.189836	-8.3589	6.33052e-17	1.11111e-14
kif11	4352.59	1.13427	0.136088	8.33482	7.76185e-17	1.34071e-14
eva1bb	64.371	-4.51268	0.545005	-8.28007	1.23104e-16	2.07557e-14
mnx1	80.3298	-5.85855	0.70762	-8.27923	1.23977e-16	2.07557e-14
fgf19	65.708	-3.07283	0.372943	-8.23943	1.73039e-16	2.85305e-14
pif1	454.53	1.56875	0.190742	8.22449	1.96019e-16	3.18371e-14
hoxa9a	430.542	-3.00218	0.365751	-8.20826	2.24412e-16	3.59126e-14
pard6gb	1355.25	-1.08782	0.134052	-8.11494	4.86015e-16	7.66495e-14
hexim1	3186.89	1.01853	0.126028	8.08179	6.38214e-16	9.92149e-14
nr2f2	92.7459	-3.3015	0.411747	-8.01826	1.07255e-15	1.64387e-13
zgc:101846	6071.97	2.31329	0.289204	7.99882	1.25613e-15	1.8985e-13
cdon	1476.79	-1.83918	0.230551	-7.97735	1.49503e-15	2.22862e-13
prmt5	1103.93	-1.21483	0.152861	-7.9473	1.90623e-15	2.80318e-13
hoxb10a	693.114	-2.07038	0.260579	-7.94532	1.93697e-15	2.81041e-13
zcchc24	1410.01	-1.36008	0.172605	-7.87973	3.28089e-15	4.69772e-13
il17rd	577.905	-1.40764	0.179747	-7.83127	4.82975e-15	6.82562e-13
fut8a	272.819	-2.01154	0.256919	-7.82946	4.8996e-15	6.83557e-13
ndufaf1	219.695	-1.49098	0.190658	-7.82021	5.27336e-15	7.26389e-13
igfbp5a	46.4281	-4.68122	0.601237	-7.78597	6.91797e-15	9.41016e-13
bmf1	65.0493	3.56127	0.458142	7.77329	7.64734e-15	1.02739e-12
mpped2	151.249	-2.3151	0.297915	-7.77099	7.7873e-15	1.03343e-12
bcam	327.609	-2.26881	0.293269	-7.73626	1.02382e-14	1.34231e-12
smad1	798.925	1.34805	0.175048	7.70103	1.34975e-14	1.74856e-12
rai14	689.74	-1.31887	0.171391	-7.69509	1.41392e-14	1.81015e-12
zgc:113983	187.645	2.25406	0.294291	7.65929	1.8696e-14	2.3657e-12
pkd2	103.989	2.46338	0.323178	7.62237	2.49062e-14	3.11528e-12
brd7	1340.19	1.0202	0.134083	7.60876	2.76745e-14	3.42221e-12
wnt4a	56.3216	-6.09811	0.803839	-7.58624	3.2933e-14	4.0267e-12
tgfb1a	67.1946	-3.7129	0.489843	-7.57977	3.46166e-14	4.18553e-12
ywhah	704.092	-1.63331	0.217252	-7.51803	5.56066e-14	6.64957e-12
taf6	331.992	-1.39396	0.187235	-7.445	9.69472e-14	1.14672e-11
pmp22a	1627.59	-1.97226	0.265143	-7.43846	1.01865e-13	1.19193e-11
lbx2	84.7311	-4.66369	0.6307	-7.39447	1.41975e-13	1.64359e-11
tbx5a	70.4439	-3.04318	0.416113	-7.31335	2.60568e-13	2.98473e-11
rab11fip4a	228.605	-1.97662	0.271289	-7.28601	3.19267e-13	3.61902e-11
calr3b	994.314	-1.50665	0.207147	-7.27334	3.50716e-13	3.93453e-11
meox1	381.347	-2.55305	0.35193	-7.25443	4.03343e-13	4.47876e-11
p4ha1b	503.944	-2.38367	0.329275	-7.23913	4.51559e-13	4.9635e-11
isl1	112.142	-4.41431	0.610274	-7.23333	4.71294e-13	5.12862e-11
dda1	954.366	1.22102	0.169015	7.22432	5.03618e-13	5.42611e-11
lmo4b	1076.51	1.10661	0.153413	7.21329	5.46163e-13	5.82681e-11
ttc27	320.83	-1.29838	0.18004	-7.21159	5.53017e-13	5.84266e-11
fgfrl1a	222.871	-2.36376	0.330327	-7.15581	8.31816e-13	8.70367e-11
angptl7	232.663	-6.40208	0.897537	-7.13295	9.82437e-13	1.01818e-10
eif4g2b	4418.06	-1.10025	0.154324	-7.12951	1.00727e-12	1.03407e-10
rorab	45.5081	-3.89528	0.547437	-7.11548	1.11521e-12	1.13418e-10
fam114a1	62.4573	-2.91487	0.410284	-7.10452	1.20746e-12	1.21663e-10
tmtc2	42.7922	-4.67705	0.664162	-7.04204	1.89449e-12	1.89136e-10
hoxb7a	353.798	-1.90751	0.271134	-7.03532	1.9881e-12	1.96677e-10
smad5	2187.27	0.826983	0.117813	7.01947	2.22705e-12	2.16382e-10
zgc:171775	107.882	-2.49228	0.355005	-7.02041	2.21223e-12	2.16382e-10
dcn	42.5963	-3.59971	0.514293	-6.99933	2.5719e-12	2.47676e-10
klhl31	46.755	-6.83729	0.978535	-6.98728	2.8027e-12	2.67535e-10
si:dkey-238o13.4	54.129	-4.32855	0.619872	-6.98296	2.89015e-12	2.73484e-10
colec12	2612.2	-1.05315	0.150923	-6.97804	2.99336e-12	2.80808e-10
dag1	1345.28	-1.57176	0.225343	-6.97499	3.05889e-12	2.84503e-10
bub3	2263.75	0.974927	0.140498	6.93906	3.9473e-12	3.60962e-10
tbx3a	1088.45	1.26166	0.181799	6.93989	3.92413e-12	3.60962e-10
speg	129.616	-2.53534	0.365761	-6.93168	4.15867e-12	3.77122e-10
meis1b	2038.78	-0.997186	0.144058	-6.92213	4.44905e-12	4.00121e-10
fn1b	929.348	-1.72221	0.248982	-6.91701	4.61286e-12	4.11452e-10
hoxa10b	211.537	-1.87467	0.271902	-6.89465	5.39976e-12	4.77725e-10
frem1b	317.061	-1.81914	0.263947	-6.89208	5.49834e-12	4.82524e-10
lrrc17	43.2732	-5.46383	0.79362	-6.88469	5.79123e-12	5.04162e-10
twist1b	38.8116	-6.13241	0.892847	-6.86837	6.49381e-12	5.60838e-10
pcbp4	196.758	-2.1656	0.315731	-6.85899	6.93488e-12	5.94215e-10
slc43a3b	83.5521	-9.16902	1.33819	-6.8518	7.29269e-12	6.19993e-10
cdx1a	233.004	2.25267	0.329009	6.84683	7.55044e-12	6.36929e-10
crabp2a	179.239	-2.54493	0.372617	-6.82987	8.49931e-12	7.11458e-10
sox5	110.214	-2.87015	0.421187	-6.81442	9.46416e-12	7.86176e-10
si:ch211-71m22.1	46.3531	-3.67361	0.539623	-6.80773	9.91518e-12	8.17402e-10
zgc:153702	172.35	1.56001	0.229609	6.7942	1.08916e-11	8.91148e-10
afap1l1a	193.308	-1.94005	0.286695	-6.76697	1.31509e-11	1.06797e-09
zgc:92066	9625.38	0.911249	0.135483	6.72595	1.74455e-11	1.40623e-09
hoxa11b	177.565	-1.8016	0.268242	-6.71635	1.86335e-11	1.49095e-09
fam212ab	226.343	2.39019	0.356696	6.70092	2.07105e-11	1.64505e-09
gtf3c2	144.88	-1.77697	0.265438	-6.69449	2.16428e-11	1.70665e-09
fkbp9	3776.04	-0.804476	0.120634	-6.66874	2.58005e-11	2.01986e-09
pitx2	101.694	-3.35539	0.504242	-6.65432	2.84609e-11	2.19654e-09
alox12	192.119	1.70322	0.255931	6.655	2.83297e-11	2.19654e-09
tbc1d16	107.491	-2.65175	0.399158	-6.64335	3.06629e-11	2.34981e-09
pcf11	686.496	-0.936264	0.141379	-6.62238	3.53471e-11	2.68984e-09
nucb2a	2269.72	0.871179	0.131591	6.62037	3.58296e-11	2.70762e-09
sgol1	1395.98	1.15352	0.174531	6.60927	3.86222e-11	2.89853e-09
nr2f5	1757.69	-1.67641	0.253984	-6.60044	4.09939e-11	3.05545e-09
gart	661.468	-1.10081	0.166933	-6.59433	4.27188e-11	3.16236e-09
mllt3	471.683	-1.08418	0.164678	-6.58362	4.59118e-11	3.37576e-09
adam8a	851.42	-1.96693	0.299105	-6.57607	4.83058e-11	3.52795e-09
vamp3	2773.61	0.752479	0.114802	6.55458	5.57989e-11	4.04802e-09
adipor1a	870.883	0.97687	0.149943	6.51496	7.27094e-11	5.23989e-09
cracr2b	716.492	-1.3231	0.203144	-6.51309	7.36221e-11	5.27076e-09
ctbp2a	646.561	-1.03592	0.159225	-6.50602	7.71671e-11	5.48845e-09
si:dkey-286j15.3	624.126	0.959875	0.147577	6.50425	7.80842e-11	5.51761e-09
zgc:171223	642.737	1.10544	0.170421	6.48653	8.78367e-11	6.1667e-09
calcoco1a	105.598	-1.81316	0.279584	-6.4852	8.86121e-11	6.18126e-09
atp1b1a	3862.93	1.19975	0.185053	6.48325	8.97695e-11	6.22211e-09
rhbdf1a	230.792	-2.06977	0.322112	-6.42563	1.31326e-10	9.04487e-09
pfkfb4b	2075.1	1.39479	0.218458	6.38469	1.71748e-10	1.17545e-08
si:dkey-117n7.5	31.1078	-4.0647	0.638443	-6.36658	1.93285e-10	1.31458e-08
adrm1	1171.06	1.24363	0.195962	6.34628	2.20582e-10	1.49091e-08
tmem119b	636.932	-1.05739	0.166806	-6.33902	2.31227e-10	1.55322e-08
gna12a	936.074	-1.00557	0.159148	-6.31844	2.64211e-10	1.76389e-08
zgc:114046	118.257	1.86597	0.295368	6.31743	2.65944e-10	1.76463e-08
ints8	606.81	-1.01394	0.161469	-6.27944	3.39805e-10	2.24107e-08
qki2	305.141	-1.49577	0.238372	-6.27493	3.49786e-10	2.293e-08
id3	2717.99	0.997657	0.15908	6.27142	3.57762e-10	2.33124e-08
fkbp10b	346.964	-1.39848	0.223501	-6.25714	3.92101e-10	2.53979e-08
nkx2.7	900.054	1.56362	0.250262	6.24791	4.15975e-10	2.67849e-08
vps29	660.63	1.0806	0.17313	6.24156	4.33242e-10	2.77326e-08
lrrn1	204.429	-2.11418	0.338995	-6.23662	4.47138e-10	2.84073e-08
fhl2a	55.5864	-6.08828	0.976317	-6.23596	4.49003e-10	2.84073e-08
foxf1	39.8143	-4.5301	0.72746	-6.22729	4.74571e-10	2.98513e-08
zgc:194209	102.129	-1.68778	0.271097	-6.22574	4.79294e-10	2.99752e-08
bmp16	325.077	-1.55304	0.249589	-6.22237	4.89707e-10	3.04514e-08
rars	994.567	-1.01743	0.163822	-6.21056	5.27964e-10	3.24889e-08
zgc:198419	1843.94	1.71825	0.276672	6.21042	5.28445e-10	3.24889e-08
rhoab	2038.55	0.907978	0.146449	6.19994	5.64849e-10	3.4532e-08
alg9	82.5586	-2.0859	0.336548	-6.19795	5.72043e-10	3.47764e-08
bckdk	1893.86	0.914357	0.14765	6.19272	5.91336e-10	3.57496e-08
fgfrl1b	1909.95	-1.26051	0.20391	-6.18173	6.34034e-10	3.81191e-08
pspc1	755.855	-0.8671	0.140293	-6.18066	6.38355e-10	3.8168e-08
aldh1a2	869.717	-1.42801	0.23155	-6.16721	6.95073e-10	4.13322e-08
vmhc	440.356	-4.95257	0.803455	-6.16409	7.08904e-10	4.17423e-08
sumo2b	1581.76	-1.01429	0.164552	-6.16392	7.09643e-10	4.17423e-08
sept9a	3421.93	-0.969755	0.157394	-6.16131	7.21449e-10	4.22087e-08
polr3a	343.447	1.38332	0.224815	6.15315	7.59578e-10	4.42017e-08
lypd6b	211.129	-1.28682	0.209172	-6.15197	7.65252e-10	4.4295e-08
ckba	950.83	1.10111	0.179148	6.14637	7.92758e-10	4.56444e-08
slit3	380.28	-2.06283	0.336109	-6.1374	8.38854e-10	4.80443e-08
ppp1r10	1078.98	-1.90592	0.310605	-6.13615	8.45475e-10	4.817e-08
chka	86.6114	-2.13614	0.348231	-6.13427	8.55515e-10	4.84881e-08
ptbp2b	674.049	-1.0883	0.177671	-6.12537	9.04749e-10	5.07499e-08
pbk	1394.24	0.756355	0.123467	6.12596	9.01386e-10	5.07499e-08
anks1b	127.755	-2.30147	0.37589	-6.12273	9.19859e-10	5.13329e-08
gata2a	917.494	1.9284	0.315043	6.12106	9.29531e-10	5.16079e-08
gypc	36.4392	-3.99837	0.653943	-6.11425	9.70103e-10	5.35871e-08
foxf2a	74.9921	-2.08897	0.342901	-6.09207	1.11462e-09	6.12593e-08
atp5g1	1560.41	0.974163	0.160065	6.08606	1.15724e-09	6.32817e-08
ppp1cbl	1428.82	0.744305	0.122569	6.07253	1.25914e-09	6.85099e-08
cstf1	3063.04	0.653282	0.107703	6.06561	1.31455e-09	7.1169e-08
has2	45.8671	-7.39686	1.22122	-6.05696	1.38715e-09	7.43595e-08
hemk1	43.7326	-2.59759	0.42883	-6.05737	1.38362e-09	7.43595e-08
msh6	363.169	-1.23373	0.203884	-6.05113	1.43834e-09	7.67256e-08
si:ch211-14a17.11	573.781	1.00974	0.167066	6.04394	1.50397e-09	7.9835e-08
fam83d	459.853	1.28233	0.212296	6.04032	1.53805e-09	8.1248e-08
ext1a	1335.87	0.978006	0.162057	6.03497	1.58992e-09	8.35819e-08
osbpl2b	194.221	1.3164	0.218343	6.02902	1.64958e-09	8.63018e-08
nucb1	1014.17	1.03307	0.171668	6.01786	1.76739e-09	9.20227e-08
pcmtd1	154.098	-1.79554	0.298605	-6.01311	1.81995e-09	9.43081e-08
pkib	51.8289	-6.01097	1.00077	-6.00638	1.89712e-09	9.7841e-08
desma	52.9916	-5.58293	0.93169	-5.99226	2.0694e-09	1.06223e-07
clic4	916.317	-1.45471	0.243133	-5.98318	2.18817e-09	1.11508e-07
hapln1a	64.4919	-4.49396	0.751141	-5.98284	2.19285e-09	1.11508e-07
ldlrap1a	365.171	-1.18609	0.198818	-5.9657	2.4359e-09	1.23291e-07
gps2	527.225	0.892187	0.14986	5.95347	2.62515e-09	1.32254e-07
caprin1b	1285.87	0.731851	0.123264	5.93728	2.89787e-09	1.45321e-07
wfdc1	53.7304	-3.7634	0.635574	-5.92126	3.19487e-09	1.5948e-07
cyp2x7	47.5819	-5.42735	0.916766	-5.9201	3.21745e-09	1.59873e-07
zmp:0000000768	147.305	1.3771	0.232861	5.91383	3.34241e-09	1.64272e-07
mdm4	521.098	-0.892456	0.150921	-5.9134	3.35126e-09	1.64272e-07
zgc:109934	1180.56	1.1485	0.194182	5.91458	3.32726e-09	1.64272e-07
atf4a	643.089	-1.33206	0.225478	-5.9077	3.4691e-09	1.69286e-07
hhip	1529.62	-1.17192	0.198698	-5.89798	3.6798e-09	1.78766e-07
ewsr1a	1943.24	-0.628322	0.106695	-5.88896	3.8863e-09	1.87959e-07
fth1a	5558.53	0.753038	0.127897	5.88787	3.91209e-09	1.88369e-07
asph	3241.34	-0.764956	0.129943	-5.88686	3.93609e-09	1.8869e-07
tnfaip6	147.647	-2.59817	0.441654	-5.88281	4.03359e-09	1.92515e-07
wbscr27	165.074	1.48609	0.253274	5.86752	4.42354e-09	2.09291e-07
ssuh2.3	111.26	2.58764	0.440967	5.86811	4.40783e-09	2.09291e-07
nap1l1	1580.87	-0.821434	0.140106	-5.86292	4.54786e-09	2.14242e-07
ldb3b	74.9544	-2.64129	0.450706	-5.86034	4.61922e-09	2.16665e-07
ism1	269.559	-1.23391	0.211056	-5.84633	5.02539e-09	2.33702e-07
col18a1	682.086	-2.43845	0.417052	-5.84688	5.00867e-09	2.33702e-07
reep3b	1418.09	0.71505	0.122568	5.8339	5.41472e-09	2.50736e-07
meis3	2217.36	-0.837982	0.143837	-5.8259	5.68045e-09	2.61926e-07
slc38a2	236.927	-1.73456	0.297954	-5.82157	5.8297e-09	2.67674e-07
her12	586.875	-4.86527	0.836606	-5.81549	6.04566e-09	2.76424e-07
slc9a3r1	2267.05	-1.14402	0.196819	-5.81254	6.15324e-09	2.80166e-07
pdgfra	1115.15	-1.33768	0.23071	-5.79813	6.70594e-09	3.04058e-07
btg1	3293.28	-1.3234	0.228554	-5.79034	7.02442e-09	3.17177e-07
caska	529.975	-1.21567	0.210091	-5.78637	7.19256e-09	3.23427e-07
sh3pxd2aa	117.764	-1.99692	0.345285	-5.78342	7.31979e-09	3.27794e-07
diexf	1395.16	-0.680501	0.117706	-5.78137	7.40946e-09	3.29424e-07
nat8l	207.064	-1.39945	0.242068	-5.78121	7.41673e-09	3.29424e-07
nudcd1	224.093	-1.0912	0.188943	-5.77527	7.68315e-09	3.3987e-07
pcdh10a	5723.64	-1.15181	0.200012	-5.75869	8.47716e-09	3.73476e-07
sema3d	103.199	-2.35787	0.411753	-5.72641	1.02579e-08	4.50105e-07
nav3	164.32	-2.96493	0.51784	-5.72558	1.0308e-08	4.50489e-07
rabac1	399.062	1.44173	0.252084	5.71925	1.06996e-08	4.65733e-07
grem1a	37.2103	-3.44758	0.603224	-5.71527	1.09533e-08	4.74874e-07
prpf4ba	474.084	1.05424	0.184766	5.70583	1.15776e-08	4.9995e-07
zgc:92429	37.2815	-5.49315	0.963368	-5.70203	1.18391e-08	5.09223e-07
nid1b	231.766	-1.94307	0.341391	-5.69163	1.2583e-08	5.38983e-07
rbms2b	1902.5	-0.866664	0.152287	-5.691	1.26301e-08	5.38983e-07
degs1	2178.9	0.737024	0.129568	5.68831	1.28299e-08	5.45371e-07
zgc:112234	133.606	1.46504	0.258228	5.67346	1.39944e-08	5.92557e-07
ccnd2a	69.9341	-3.57753	0.63069	-5.6724	1.40812e-08	5.93919e-07
gstk1	47.0795	-2.55818	0.451343	-5.66792	1.44542e-08	6.07298e-07
capzb	3084.54	0.65165	0.115038	5.66466	1.47318e-08	6.16581e-07
hoxa3a	84.7338	-2.20996	0.390212	-5.66349	1.48325e-08	6.1842e-07
ywhaz	4023.46	0.787047	0.139335	5.64861	1.6175e-08	6.71816e-07
calm3b	15503	0.606267	0.107353	5.64743	1.62865e-08	6.73876e-07
hs6st1a	102.471	-1.57577	0.279679	-5.63422	1.75853e-08	7.24861e-07
tmod2	257.466	1.53981	0.273429	5.63149	1.78659e-08	7.33649e-07
akirin1	1475.98	0.906558	0.161	5.63079	1.79388e-08	7.33874e-07
kdm2ba	555.597	-0.905137	0.160805	-5.62878	1.81489e-08	7.39685e-07
col15a1b	373.083	-2.65108	0.471206	-5.62615	1.84276e-08	7.48243e-07
klhl40a	29.9124	-4.95476	0.881211	-5.62267	1.8803e-08	7.60647e-07
lhfp	174.049	-1.43451	0.255384	-5.61706	1.94239e-08	7.81562e-07
tacc3	1510.94	0.861852	0.153445	5.6167	1.94636e-08	7.81562e-07
ywhabb	6457.36	0.633167	0.112825	5.61194	2.0007e-08	8.00428e-07
txndc15	639.094	0.846274	0.150909	5.60785	2.0486e-08	8.1659e-07
vdac2	3464.43	0.641018	0.114331	5.60668	2.06246e-08	8.19114e-07
nanos1	111.408	-2.96746	0.529403	-5.6053	2.07893e-08	8.22653e-07
hoxd11a	120.544	-2.28002	0.406845	-5.60415	2.09278e-08	8.25131e-07
psmd4a	1145.43	0.78	0.139514	5.59082	2.26005e-08	8.87865e-07
dnmt3ab	65.9729	-2.13351	0.381784	-5.58825	2.29367e-08	8.97832e-07
las1l	415.925	0.972729	0.174114	5.58674	2.31367e-08	9.02412e-07
cbwd	100.76	-1.54966	0.277548	-5.5834	2.35858e-08	9.16644e-07
cdk7	730.487	0.966685	0.173225	5.58051	2.39811e-08	9.28691e-07
obsl1a	22.0504	-8.20097	1.47121	-5.57429	2.48547e-08	9.59109e-07
lama5	1128.97	-1.63974	0.294333	-5.57102	2.53249e-08	9.738e-07
hacd3	339.17	-1.04181	0.187094	-5.56836	2.57146e-08	9.85305e-07
atp1b2b	39.1007	-2.87845	0.517062	-5.56694	2.59258e-08	9.89911e-07
slc16a10	633.794	-1.70676	0.306791	-5.56328	2.64752e-08	1.00735e-06
nuf2	304.253	1.06543	0.19157	5.5616	2.67314e-08	1.01356e-06
ptp4a2a	1999.86	1.3159	0.236643	5.5607	2.68701e-08	1.01528e-06
yrk	144.785	-2.26664	0.407985	-5.5557	2.76506e-08	1.04115e-06
zc4h2	2275	0.729604	0.131345	5.55486	2.77834e-08	1.04255e-06
pfdn1	493.344	-0.824424	0.148564	-5.54929	2.86827e-08	1.0726e-06
gdi1	149.119	-1.46197	0.26402	-5.53735	3.07088e-08	1.14443e-06
prkag2a	154.528	-2.40305	0.43432	-5.53289	3.15001e-08	1.16991e-06
tbx20	1403.41	1.37655	0.249103	5.52603	3.27551e-08	1.21239e-06
chst3a	43.3458	-2.79371	0.507043	-5.5098	3.59236e-08	1.32515e-06
nusap1	2413.31	0.920549	0.167152	5.50724	3.64493e-08	1.34001e-06
foxi2	31.4314	-5.82684	1.06061	-5.49383	3.93299e-08	1.44104e-06
apobec2a	33.0806	-5.59613	1.01974	-5.48779	4.06989e-08	1.48619e-06
tktb	337.376	-1.28432	0.234182	-5.4843	4.1511e-08	1.51078e-06
ccnb2	543.091	0.929309	0.169626	5.47857	4.28768e-08	1.55529e-06
gsc	38.2789	4.47227	0.818801	5.46197	4.70886e-08	1.70099e-06
fbxo30b	105.4	1.47114	0.269365	5.46152	4.72064e-08	1.70099e-06
psma1	4106.57	0.646026	0.118574	5.44828	5.08595e-08	1.82658e-06
mtr	90.4255	-1.94338	0.356926	-5.44478	5.18687e-08	1.8567e-06
hoxc10a	115.177	-1.7634	0.324498	-5.43424	5.50312e-08	1.96344e-06
ldb2b	170.992	-1.35421	0.249435	-5.42911	5.6636e-08	2.0141e-06
chrac1	1652.77	0.730649	0.134692	5.42461	5.80816e-08	2.05124e-06
msl2a	901.987	0.945391	0.174264	5.42504	5.79401e-08	2.05124e-06
fzd7b	2431	0.676721	0.124762	5.4241	5.82461e-08	2.05124e-06
nfasca	26.9041	-5.27022	0.971818	-5.42306	5.85886e-08	2.05665e-06
rbpms2b	240.259	-1.85525	0.34248	-5.41712	6.0568e-08	2.1193e-06
zgc:91910	1553.67	0.943821	0.175174	5.38792	7.12785e-08	2.48607e-06
gpc6a	29.6432	-3.85643	0.715882	-5.38696	7.16577e-08	2.49131e-06
usp39	1578.67	0.816524	0.151706	5.38227	7.35518e-08	2.54901e-06
sdcbp2	2639.64	0.644936	0.120046	5.37239	7.76984e-08	2.68417e-06
grinab	1874.88	0.696207	0.129863	5.36109	8.27193e-08	2.84858e-06
zgc:103697	1073.29	0.68141	0.127597	5.34032	9.27843e-08	3.18511e-06
fibinb	352.506	-0.930621	0.174345	-5.33781	9.40783e-08	3.21937e-06
mab21l2	196.9	-1.88186	0.353161	-5.32861	9.89648e-08	3.37597e-06
lmo7a	42.6118	-3.62015	0.679893	-5.32459	1.01181e-07	3.44077e-06
etv5b	463.781	-2.19139	0.412006	-5.31884	1.04433e-07	3.52931e-06
gfi1ab	142.303	2.20939	0.415349	5.31937	1.0413e-07	3.52931e-06
si:ch211-226h8.14	297.825	1.51407	0.28522	5.30844	1.10566e-07	3.72501e-06
aurka	1968.45	0.819886	0.154472	5.30767	1.11036e-07	3.7293e-06
dub	24.8653	-4.45226	0.839264	-5.30496	1.12701e-07	3.75781e-06
sox10	58.9634	-5.77769	1.08918	-5.3046	1.12921e-07	3.75781e-06
hexb	1152.6	0.635469	0.119777	5.30542	1.12411e-07	3.75781e-06
ndufb8	1187.9	0.770328	0.145239	5.30385	1.13383e-07	3.7617e-06
atrx	2619.07	-0.591133	0.111676	-5.29328	1.20143e-07	3.97385e-06
ip6k2b	160.215	-1.42112	0.268707	-5.28872	1.23176e-07	4.06184e-06
irx3a	809.531	-0.964815	0.182831	-5.2771	1.31242e-07	4.31472e-06
cdca8	1117.49	0.822298	0.155981	5.27177	1.35111e-07	4.42856e-06
ube2d2l	560.253	0.902155	0.171808	5.25094	1.51329e-07	4.94522e-06
rx1	38.3229	-8.03897	1.53207	-5.24712	1.54496e-07	5.03362e-06
tnnt1	77.6517	-4.70532	0.898422	-5.23731	1.62935e-07	5.29271e-06
dnajc3a	72.8887	-2.5323	0.484156	-5.23034	1.69199e-07	5.47984e-06
fam160b2	209.68	-1.13943	0.218108	-5.22415	1.74954e-07	5.6494e-06
ehhadh	42.9284	-2.83861	0.543985	-5.21818	1.80689e-07	5.81732e-06
prc1b	831.948	0.783965	0.150397	5.21262	1.86193e-07	5.97686e-06
lmo3	28.1056	-3.58242	0.688045	-5.20667	1.92261e-07	6.15349e-06
si:ch211-57h10.1	53.9243	-1.87287	0.359839	-5.20475	1.94259e-07	6.19919e-06
mafbb	34.8948	-3.11408	0.59843	-5.20375	1.95303e-07	6.21431e-06
smtnl1	369.776	-7.3171	1.40784	-5.19741	2.02083e-07	6.41129e-06
ube2d1b	1367.4	0.703284	0.135391	5.19446	2.05316e-07	6.49492e-06
zgpat	1047.04	0.722492	0.139139	5.1926	2.07375e-07	6.52213e-06
gldc	202.744	-1.08244	0.208448	-5.19289	2.07059e-07	6.52213e-06
snrnp48	436.28	0.858419	0.165533	5.18579	2.15099e-07	6.74556e-06
pdcd4a	1101.76	-0.879915	0.169836	-5.18097	2.20738e-07	6.9025e-06
marcksl1b	3506.85	1.02211	0.197432	5.17705	2.25423e-07	7.02879e-06
ccdc84	408.451	1.07694	0.208242	5.17159	2.32114e-07	7.21676e-06
zgc:66433	806.348	-1.03262	0.199767	-5.16915	2.35155e-07	7.29048e-06
uck2b	514.379	-1.32234	0.255936	-5.16668	2.38292e-07	7.36675e-06
foxj1a	23.0399	-4.54545	0.880105	-5.16467	2.40865e-07	7.42519e-06
ranbp9	712.673	0.69282	0.134292	5.15904	2.48215e-07	7.63015e-06
qkia	12088.7	-1.24508	0.241738	-5.15052	2.59763e-07	7.96265e-06
plcd1a	24.6798	-3.29349	0.640759	-5.13999	2.7476e-07	8.38501e-06
apeh	133.978	-1.27405	0.24788	-5.13976	2.75083e-07	8.38501e-06
arf6b	2977.54	0.628908	0.122386	5.13872	2.7661e-07	8.40802e-06
mat2al	174.99	-1.23934	0.241244	-5.13726	2.7877e-07	8.42274e-06
fkbp14	303.545	-0.9521	0.185341	-5.13703	2.79119e-07	8.42274e-06
rtkn2a	1061.54	1.00476	0.1956	5.13683	2.79416e-07	8.42274e-06
bloc1s3	250.836	-5.74565	1.11907	-5.13428	2.83223e-07	8.5139e-06
ing3	660.177	0.830934	0.162191	5.1232	3.00397e-07	8.98124e-06
ifrd2	1167.73	-0.70419	0.137452	-5.12318	3.0042e-07	8.98124e-06
rbm4.1	1104.61	0.798313	0.156151	5.11244	3.18017e-07	9.48126e-06
mnx2b	39.1316	2.79241	0.546446	5.11013	3.21944e-07	9.57212e-06
tmem45a	122.094	-1.67414	0.327751	-5.10795	3.25677e-07	9.65673e-06
prrx1a	1096.23	-0.775426	0.151848	-5.10658	3.28044e-07	9.70046e-06
zgc:92818	323.359	-1.12668	0.220921	-5.09991	3.39815e-07	1.00213e-05
fsta	95.6582	-2.84596	0.558104	-5.09933	3.40855e-07	1.00248e-05
zgc:136892	69.7024	1.73921	0.341798	5.08842	3.61065e-07	1.05906e-05
maea	938.838	0.761874	0.149789	5.08632	3.65077e-07	1.06795e-05
scg3	154.465	-1.36357	0.268132	-5.08545	3.66762e-07	1.07e-05
fam160b1	61.5818	1.79521	0.353047	5.08491	3.678e-07	1.07016e-05
si:ch73-109d9.2	430.882	0.773038	0.152079	5.08312	3.71282e-07	1.07455e-05
nfybb	153.951	1.2302	0.241995	5.08357	3.70402e-07	1.07455e-05
uncx4.1	38.5667	-4.69027	0.92369	-5.07776	3.81916e-07	1.10239e-05
marveld1	185.863	-1.45045	0.285704	-5.07677	3.83901e-07	1.10519e-05
rcn3	118.07	-2.82968	0.557569	-5.07503	3.87443e-07	1.11244e-05
gopc	287.559	1.36398	0.268916	5.07213	3.93379e-07	1.12651e-05
cd151	560.964	-1.02696	0.202545	-5.07029	3.97205e-07	1.13448e-05
wu:fc13c02	1326.1	-1.32514	0.261974	-5.05831	4.22989e-07	1.20497e-05
mlf2	750.511	0.64406	0.127891	5.03601	4.75345e-07	1.35057e-05
mccc2	1561.41	0.687645	0.136593	5.03427	4.79679e-07	1.35934e-05
pleca	106.235	-2.40194	0.477589	-5.02931	4.92256e-07	1.39136e-05
tnc	28.3184	-4.62778	0.920996	-5.02475	5.04076e-07	1.42108e-05
nfs1	567.869	-0.91935	0.18317	-5.01911	5.19109e-07	1.45967e-05
ncapg	1862.36	0.725037	0.144668	5.01171	5.39473e-07	1.51303e-05
impdh2	376.428	-0.986342	0.196864	-5.01028	5.43523e-07	1.52047e-05
lifrb	41.543	-4.00242	0.799392	-5.00683	5.5334e-07	1.54396e-05
txlna	1068.5	0.616149	0.123124	5.00429	5.60681e-07	1.56044e-05
ola1	1909.84	0.683731	0.136674	5.00263	5.65533e-07	1.56993e-05
mfn2	219.768	-1.10024	0.22014	-4.99791	5.79536e-07	1.60471e-05
rybpa	426.195	0.838888	0.168003	4.99328	5.93631e-07	1.63957e-05
pgrmc2	1307.99	0.638428	0.127939	4.99009	6.035e-07	1.6626e-05
tmeff1b	2905.6	0.684544	0.137232	4.98822	6.09396e-07	1.67461e-05
kcnip1b	733.146	-0.871323	0.17494	-4.98071	6.33521e-07	1.73652e-05
cyp26c1	286.887	-2.01159	0.404045	-4.97863	6.4037e-07	1.75088e-05
unc5c	289.699	-1.82261	0.36621	-4.97696	6.45906e-07	1.76159e-05
atp5c1	4569.25	0.633929	0.127408	4.9756	6.50473e-07	1.76961e-05
ubxn1	1804.05	0.619192	0.124459	4.97508	6.52207e-07	1.7699e-05
tamm41	63.9072	-2.09049	0.420719	-4.96885	6.73504e-07	1.82315e-05
ppp2r1b	3156.29	0.589741	0.118777	4.96512	6.86576e-07	1.85392e-05
cldn5a	126.592	-3.01811	0.608899	-4.95667	7.17116e-07	1.9316e-05
faima	74.9502	1.87651	0.378628	4.95608	7.19298e-07	1.93269e-05
si:ch211-13c6.2	1505.21	0.685273	0.138386	4.95189	7.3496e-07	1.96991e-05
col8a1a	106.785	-3.57867	0.723159	-4.94867	7.47233e-07	1.99788e-05
zgc:91897	101.812	-1.54607	0.312515	-4.94718	7.52945e-07	2.00822e-05
zgc:55461	1069.83	0.740397	0.14969	4.9462	7.56781e-07	2.01352e-05
nudcd3	1057.75	0.688255	0.13917	4.94544	7.59718e-07	2.0164e-05
ppm1db	284.495	0.908779	0.184029	4.93825	7.88287e-07	2.08714e-05
gng12a	482.397	-1.10221	0.223223	-4.9377	7.90513e-07	2.08795e-05
zgc:158604	881.905	-0.731447	0.148281	-4.93284	8.1044e-07	2.1354e-05
cyth1b	669.407	-0.692468	0.140556	-4.92665	8.3652e-07	2.19879e-05
nkx6.2	24.5015	-5.49491	1.11749	-4.91719	8.77938e-07	2.29657e-05
fgf10b	495.695	-0.830543	0.168904	-4.91726	8.7766e-07	2.29657e-05
hnrnpl2	7399.89	0.601459	0.122365	4.9153	8.86471e-07	2.31333e-05
tnfsf10l3	24.1401	-3.57282	0.727732	-4.90953	9.1294e-07	2.3767e-05
mpc1	436.049	-0.835206	0.170177	-4.90787	9.20699e-07	2.39118e-05
eif4a1a	17104	-0.809207	0.164993	-4.9045	9.36645e-07	2.4268e-05
etv5a	1551	0.902207	0.184172	4.89871	9.64671e-07	2.49348e-05
atp13a2	45.5837	-2.03663	0.415946	-4.89638	9.76196e-07	2.51729e-05
sh3gl3a	127.693	1.39823	0.286018	4.88861	1.01551e-06	2.61247e-05
zgc:173587	76.2491	1.7333	0.354728	4.88628	1.02758e-06	2.63729e-05
stxbp5l	23.2813	-3.62361	0.741793	-4.88494	1.03462e-06	2.64912e-05
smad9	723.1	1.0442	0.213859	4.88265	1.04669e-06	2.67366e-05
mki67	7877.77	0.772562	0.158249	4.88193	1.0505e-06	2.67366e-05
hoxa2b	76.0766	-1.78097	0.364823	-4.88173	1.05158e-06	2.67366e-05
ap3m1	219.347	-1.05059	0.215248	-4.88083	1.05638e-06	2.67449e-05
mylk3	99.6519	-2.33456	0.478321	-4.88075	1.05682e-06	2.67449e-05
nr2f1b	33.9787	-3.03129	0.621421	-4.87799	1.07172e-06	2.7059e-05
fzd8a	302.62	-2.56284	0.525633	-4.87573	1.08407e-06	2.73076e-05
lpar2a	453.5	1.08819	0.223335	4.87248	1.10206e-06	2.76965e-05
fbxl14a	1029.08	0.751248	0.15421	4.87158	1.10709e-06	2.77588e-05
egr2a	22.697	-8.25267	1.69473	-4.86962	1.11813e-06	2.79713e-05
chst11	33.0556	-3.20033	0.658346	-4.86117	1.16696e-06	2.91259e-05
tcea1	2319.09	0.564208	0.116082	4.86043	1.17131e-06	2.91675e-05
fzd10	1093.22	-1.06677	0.219526	-4.85945	1.17714e-06	2.92457e-05
mgat1b	98.2381	-1.75508	0.361274	-4.85804	1.18556e-06	2.93878e-05
eri1	566.612	0.764025	0.157406	4.85383	1.21097e-06	2.99496e-05
apln	35.5592	-5.17332	1.06661	-4.85023	1.2332e-06	3.04301e-05
tbx2b	1150.39	1.08927	0.224647	4.8488	1.24208e-06	3.05e-05
cmtm6	1079.34	0.731821	0.150938	4.8485	1.24399e-06	3.05e-05
mad2l1	1517.15	0.790103	0.162961	4.84843	1.24444e-06	3.05e-05
zic2a	85.8923	-3.71321	0.766254	-4.84593	1.26019e-06	3.08167e-05
zgc:86764	686.983	0.871028	0.180003	4.83895	1.30524e-06	3.18467e-05
efna1b	252.75	1.37119	0.283611	4.83476	1.33309e-06	3.24533e-05
egfl6	36.0763	-6.06829	1.25537	-4.83386	1.3391e-06	3.2527e-05
hoxd12a	22.2679	-4.48802	0.930167	-4.82496	1.40032e-06	3.39382e-05
efemp2a	52.7813	-4.42781	0.918394	-4.82125	1.42663e-06	3.44991e-05
hyi	25.6223	-3.07436	0.637744	-4.82069	1.43063e-06	3.45191e-05
dnph1	89.7679	1.40402	0.291282	4.82015	1.43452e-06	3.45364e-05
ppapdc3	57.3965	-2.52379	0.524073	-4.81572	1.46672e-06	3.52337e-05
frs2a	242.731	1.17153	0.243378	4.81361	1.48231e-06	3.55297e-05
acss1	220.023	-1.22289	0.254401	-4.80692	1.53277e-06	3.66584e-05
ik	2110.22	0.754103	0.15698	4.80383	1.55663e-06	3.71474e-05
nexn	80.7532	-2.97016	0.61845	-4.80259	1.56628e-06	3.72959e-05
six2a	24.3509	-4.63425	0.965167	-4.8015	1.57483e-06	3.74176e-05
col11a1b	46.4923	-2.55117	0.531666	-4.79845	1.59901e-06	3.79093e-05
uqcrc2a	815.614	0.71848	0.149872	4.79398	1.63508e-06	3.86804e-05
upf3b	950.306	0.753366	0.157401	4.78628	1.69904e-06	4.01062e-05
thbs3b	485.244	-1.28766	0.269091	-4.78521	1.70805e-06	4.02315e-05
lamp2	1093.76	0.745147	0.156072	4.77437	1.80268e-06	4.22903e-05
fstl1b	597.3	-0.927004	0.194165	-4.77431	1.80322e-06	4.22903e-05
srrt	2246.52	0.77687	0.162748	4.77344	1.81105e-06	4.23824e-05
lpp	101.383	-1.31083	0.274662	-4.7725	1.81951e-06	4.24891e-05
blvra	103.149	-1.24941	0.261919	-4.77022	1.84024e-06	4.28811e-05
pop7	582.202	0.717472	0.150426	4.76959	1.84602e-06	4.2924e-05
msxe	104.945	1.44732	0.303529	4.76831	1.85778e-06	4.30455e-05
mepce	339.187	-1.32645	0.27819	-4.76816	1.85916e-06	4.30455e-05
ccdc130	449.928	0.978086	0.205156	4.76753	1.86494e-06	4.30876e-05
slc11a2	132.55	-1.62252	0.340516	-4.76489	1.88953e-06	4.35632e-05
p4ha2	304.323	-1.24493	0.261402	-4.76252	1.91188e-06	4.39853e-05
pitpnbl	2332.95	0.740146	0.155663	4.75481	1.98634e-06	4.5602e-05
tubg1	1294.6	0.624769	0.13149	4.75145	2.01965e-06	4.62692e-05
tnfaip2a	232.086	-1.09343	0.23015	-4.75094	2.02477e-06	4.62889e-05
etfa	883.857	0.761281	0.16031	4.7488	2.04629e-06	4.6683e-05
sf3b5	1312.23	0.626937	0.132105	4.74576	2.07724e-06	4.72898e-05
f13a1b	227.781	-2.02377	0.427847	-4.73013	2.24376e-06	5.09741e-05
si:ch211-286b5.5	1480.58	0.874043	0.184845	4.72853	2.26155e-06	5.12712e-05
tmem126a	65.3396	-1.52833	0.323627	-4.72252	2.32937e-06	5.26989e-05
impad1	297.689	0.993006	0.210426	4.71902	2.36988e-06	5.35043e-05
arpc3	1644.96	0.627271	0.132941	4.71841	2.37689e-06	5.35514e-05
papss2b	185.884	-1.36196	0.288788	-4.71613	2.40373e-06	5.40443e-05
prps1a	3705.09	-0.55548	0.117808	-4.71515	2.41533e-06	5.41931e-05
slc43a1b	78.6054	-1.49949	0.318086	-4.71409	2.42793e-06	5.43637e-05
klhdc4	160.389	-1.1842	0.251285	-4.71256	2.44621e-06	5.46605e-05
snrnp27	1405.74	0.640163	0.135888	4.71095	2.46566e-06	5.49822e-05
sall1a	234.409	-1.5697	0.3334	-4.70816	2.49958e-06	5.56246e-05
zgc:123035	44.9169	-1.92992	0.410106	-4.70591	2.52737e-06	5.61283e-05
pou3f1	30.5196	-5.45017	1.1597	-4.69963	2.60634e-06	5.77642e-05
pfkfb1	220.372	-1.27508	0.271484	-4.69669	2.64411e-06	5.84821e-05
nrbf2b	354.166	0.789713	0.168204	4.69497	2.66647e-06	5.88571e-05
rybpb	1094.94	0.783126	0.166894	4.69237	2.70064e-06	5.94905e-05
zgc:162198	114.67	-1.25997	0.26855	-4.69174	2.70894e-06	5.94962e-05
cbsb	718.437	-0.921899	0.196503	-4.69152	2.71183e-06	5.94962e-05
mat2aa	1847.09	-0.731448	0.156091	-4.68604	2.78537e-06	6.09445e-05
arl6ip1	1116.43	0.623045	0.132965	4.68577	2.78904e-06	6.09445e-05
bud31	2647.52	0.494728	0.105627	4.68374	2.81691e-06	6.14302e-05
znf207b	3343.47	0.629455	0.134659	4.67443	2.94764e-06	6.41525e-05
nlgn4a	215.569	-1.9993	0.427783	-4.67364	2.95912e-06	6.42737e-05
stmn1b	37.8071	-7.12259	1.52461	-4.67176	2.9863e-06	6.47349e-05
col2a1a	239.343	-6.45759	1.38326	-4.66837	3.03598e-06	6.5681e-05
psmc2	3141.29	0.628911	0.134784	4.66605	3.0704e-06	6.62938e-05
plk1	3507.62	0.468627	0.100444	4.66557	3.07759e-06	6.63175e-05
si:dkeyp-117h8.4	474.751	0.870072	0.186681	4.66075	3.15061e-06	6.77567e-05
ndc80	1458	0.677222	0.145439	4.65641	3.21771e-06	6.89567e-05
si:dkey-207j16.2	1677.09	-0.852498	0.183084	-4.65632	3.21908e-06	6.89567e-05
tmem50a	2030.93	0.666689	0.14323	4.65466	3.2451e-06	6.93777e-05
net1	735.396	-1.82845	0.392908	-4.65363	3.26141e-06	6.95896e-05
elavl3	43.3341	-4.13053	0.888765	-4.64749	3.35992e-06	7.15512e-05
bag2	108.374	-1.34641	0.28979	-4.64616	3.38166e-06	7.18735e-05
rtf1	2148.75	0.760846	0.163797	4.64505	3.39988e-06	7.21199e-05
mibp2	1039.76	0.672574	0.145118	4.63466	3.57526e-06	7.56926e-05
rdh10b	470.733	0.803837	0.173491	4.6333	3.59889e-06	7.6045e-05
ndufa13	317.222	0.8323	0.179993	4.62407	3.76275e-06	7.93531e-05
mnx2a	14.905	-4.40165	0.95202	-4.62348	3.77352e-06	7.94265e-05
szrd1	1911.56	0.606324	0.131163	4.62267	3.78838e-06	7.95852e-05
gkap1	789.415	0.637081	0.137847	4.62166	3.80679e-06	7.98179e-05
zic5	28.2984	-4.64467	1.00556	-4.61899	3.85622e-06	8.06988e-05
kcnk5a	158.591	-1.12125	0.243036	-4.61353	3.95893e-06	8.26135e-05
ccnt1	664.741	0.752273	0.163066	4.61332	3.9629e-06	8.26135e-05
tnni1b	239.318	-4.00791	0.869086	-4.61164	3.99513e-06	8.31263e-05
homezb	811.63	0.692711	0.150238	4.61076	4.01203e-06	8.33185e-05
taf12	524.256	0.647528	0.14049	4.60906	4.04489e-06	8.3841e-05
lman2	3502.09	0.511915	0.111123	4.60673	4.09055e-06	8.46262e-05
cxcl12a	6049.63	-1.01415	0.220331	-4.60284	4.16762e-06	8.6057e-05
fgf4	17.4223	-6.01224	1.30704	-4.59991	4.22679e-06	8.71134e-05
ebf2	42.2516	-3.92307	0.853162	-4.59827	4.26008e-06	8.76336e-05
clta	2122.39	0.587224	0.127741	4.597	4.28611e-06	8.80027e-05
hoxa11a	13.3881	-4.99881	1.08755	-4.59638	4.29895e-06	8.81002e-05
chp2	77.67	-2.14342	0.466652	-4.59319	4.36528e-06	8.92913e-05
pole3	1359	0.783774	0.170662	4.59255	4.37866e-06	8.9397e-05
gpn2	533.785	0.682313	0.149016	4.57879	4.67683e-06	9.53057e-05
ednraa	297.577	-1.85949	0.406181	-4.57799	4.69471e-06	9.54912e-05
psmg1	1086.92	0.767363	0.167716	4.57537	4.75379e-06	9.65126e-05
polr3gla	158.825	-1.04594	0.228817	-4.57106	4.85265e-06	9.83258e-05
si:dkey-20d21.12	14.5753	-4.70177	1.02868	-4.57069	4.86117e-06	9.83258e-05
txndc9	1154.78	0.803793	0.175889	4.56989	4.87985e-06	9.85205e-05
aco2	2562.4	0.645457	0.14149	4.56184	5.07066e-06	0.000102183
zgc:112966	144.601	1.20159	0.263514	4.55987	5.11865e-06	0.00010296
ube2c	1511.26	0.766588	0.168188	4.55791	5.16649e-06	0.000103539
her8a	306.635	-1.01866	0.223488	-4.55802	5.16371e-06	0.000103539
thbs4b	21.0789	-7.16313	1.57228	-4.5559	5.21622e-06	0.000104344
wt1a	76.9647	-2.03187	0.44612	-4.55454	5.24993e-06	0.000104825
roraa	9.35827	-6.96005	1.5284	-4.55381	5.26824e-06	0.000104998
maf	13.927	-4.28798	0.942297	-4.55056	5.35042e-06	0.000106441
eral1	263.59	0.9096	0.200146	4.54469	5.50162e-06	0.000109249
nup93	3051.45	0.516128	0.113703	4.53925	5.64543e-06	0.000111091
angpt1	15.8259	-5.85975	1.2908	-4.53963	5.6352e-06	0.000111091
zmat2	1377.46	0.653353	0.143929	4.53942	5.64099e-06	0.000111091
cycsb	3059.13	0.599824	0.132099	4.54073	5.60594e-06	0.000111091
zgc:86609	60.3818	-1.92106	0.423111	-4.54032	5.61683e-06	0.000111091
celf2	31.7217	-3.20494	0.706224	-4.53813	5.67552e-06	0.000111482
arid3b	3328.5	-0.576296	0.127082	-4.53482	5.76526e-06	0.000113041
kazald2	27.6621	-3.45847	0.762737	-4.53429	5.77986e-06	0.000113123
sema4c	235.367	-1.28743	0.283971	-4.53365	5.79743e-06	0.000113263
bag4	231.826	-0.987839	0.217957	-4.53226	5.83546e-06	0.000113802
mcm6	4770.19	-0.607246	0.13419	-4.52528	6.03153e-06	0.000117415
zgc:158409	15413.1	-0.481724	0.106493	-4.52351	6.08223e-06	0.000118191
arvcfb	21.8551	-3.27825	0.725612	-4.51792	6.24512e-06	0.00012114
b3gat3	355.195	0.809445	0.179328	4.51376	6.36869e-06	0.000123317
crip2	98.186	-2.1466	0.475683	-4.51266	6.40195e-06	0.000123741
slc25a24	281.039	-0.900038	0.199497	-4.51154	6.43572e-06	0.000124173
plxna4	20.9607	-2.91606	0.646433	-4.511	6.45228e-06	0.000124272
prickle1b	931.875	-0.880429	0.195219	-4.50996	6.4839e-06	0.00012466
hmg20b	898.253	0.754695	0.167431	4.50749	6.55998e-06	0.000125901
bnc2	148.054	-1.88028	0.417673	-4.50181	6.73784e-06	0.000129087
slc52a2	107.02	-1.42611	0.317117	-4.4971	6.88864e-06	0.000131744
tbck	223.044	-0.879517	0.195686	-4.49454	6.97218e-06	0.000133107
klf9	18.7286	-4.21792	0.939694	-4.48861	7.16895e-06	0.000136624
rab2a	2838.33	0.54771	0.122125	4.48483	7.2971e-06	0.000138823
cdk5rap3	138.074	-1.26806	0.282996	-4.48083	7.43528e-06	0.000140959
fkbp7	172.544	-0.983702	0.219526	-4.48103	7.42837e-06	0.000140959
vasnb	357.715	-1.15472	0.257825	-4.47869	7.51008e-06	0.00014213
dhrs3a	58.9115	-2.16136	0.482672	-4.4779	7.53797e-06	0.00014241
arpp19a	2432.49	0.649405	0.145174	4.47327	7.70307e-06	0.000145277
tp53rk	339.212	-0.858984	0.192097	-4.47161	7.76344e-06	0.000145996
tmigd1	131.686	1.44549	0.323268	4.47148	7.76802e-06	0.000145996
senp3b	965.932	0.631187	0.141224	4.46942	7.84336e-06	0.000147158
prdm1a	248.575	-1.69276	0.379275	-4.46314	8.07675e-06	0.000151276
crlf3	669.502	-0.836864	0.187562	-4.4618	8.12746e-06	0.000151964
si:rp71-45k5.4	1479.1	0.624756	0.140112	4.45898	8.23519e-06	0.000153714
jade3	1022.31	-0.578828	0.130168	-4.44677	8.71728e-06	0.000162434
ncapd2	2411.22	0.592627	0.133343	4.44438	8.81453e-06	0.000163965
gfra1b	13.6364	-5.61066	1.26294	-4.44254	8.89025e-06	0.000165092
tlr3	80.4856	1.47382	0.332137	4.4374	9.10506e-06	0.000168793
purbb	186.62	1.51117	0.340665	4.43595	9.16653e-06	0.000169643
col11a1a	72.2362	-2.97583	0.670926	-4.43541	9.18978e-06	0.000169785
daxx	741.346	0.677537	0.152925	4.43053	9.40019e-06	0.000173378
depdc1a	1165.25	0.592293	0.133788	4.4271	9.55075e-06	0.000175857
nup62l	2509.4	0.602388	0.136228	4.42192	9.7829e-06	0.000179827
vcp	12479.8	0.44969	0.101729	4.42046	9.84894e-06	0.000180736
tcp11l2	62.7825	-1.4511	0.328423	-4.41838	9.94439e-06	0.00018218
eif4ebp1	4478.73	0.478122	0.10823	4.41764	9.97851e-06	0.000182498
gdf11	10.9689	-7.18807	1.62854	-4.4138	1.0157e-05	0.000185204
mpv17	194.043	-1.088	0.246524	-4.41337	1.01775e-05	0.000185204
gxylt2	317.719	1.15564	0.261837	4.4136	1.01664e-05	0.000185204
si:ch73-111k22.2	929.927	0.635261	0.144108	4.40823	1.04219e-05	0.000189334
znf207a	1788.24	0.655086	0.148739	4.40426	1.06148e-05	0.000192516
agtr2	15.9089	-3.77702	0.857746	-4.40342	1.06557e-05	0.000192937
tead3b	217.175	0.958103	0.217695	4.40114	1.07685e-05	0.000194656
pim3	224.706	-1.47504	0.335607	-4.39513	1.10706e-05	0.000199784
tfap2a	72.5465	-3.79902	0.86486	-4.39264	1.11983e-05	0.000201755
actn2b	63.7552	-2.17842	0.496161	-4.39055	1.13064e-05	0.000203365
zgc:113397	87.6439	2.05026	0.467212	4.38829	1.14244e-05	0.000205148
znf385b	58.4887	-2.06077	0.469897	-4.38557	1.15681e-05	0.000207387
pi4k2b	935.225	0.714982	0.163127	4.38297	1.17072e-05	0.000209323
birc5a	638.946	1.04436	0.238284	4.38283	1.17145e-05	0.000209323
hoxc6b	72.6359	-1.62795	0.371617	-4.38072	1.18285e-05	0.000211013
lrrc40	213.705	0.956219	0.218371	4.37888	1.19292e-05	0.000212461
irx5a	189.678	-1.24169	0.283633	-4.37781	1.19876e-05	0.000213153
dnmt3bb.2	1170.02	-0.669384	0.152961	-4.37617	1.2078e-05	0.00021441
snx9b	201.995	-1.09249	0.249797	-4.3735	1.2227e-05	0.000216701
phgdh	643.51	-0.767719	0.175569	-4.37275	1.2269e-05	0.000217091
slco3a1	54.888	-1.98863	0.455354	-4.36723	1.25834e-05	0.000222293
nit1	13.6115	-7.50834	1.71969	-4.36611	1.26479e-05	0.00022307
hoxc8a	618.994	-1.18647	0.271962	-4.36262	1.28514e-05	0.000226293
smarcb1a	1548.33	0.585138	0.134162	4.36141	1.29226e-05	0.000227179
arpp19b	828.661	0.727934	0.166952	4.36013	1.29982e-05	0.00022814
tmem88b	2255.14	-0.819855	0.188219	-4.35587	1.32542e-05	0.000232258
gbx1	70.6673	-2.8124	0.646255	-4.35183	1.35004e-05	0.000236191
arpc4	1680.12	0.597588	0.137401	4.34924	1.36612e-05	0.000238622
tcf21	14.2383	-3.42629	0.787918	-4.34853	1.37051e-05	0.000239005
actb2	25300	0.544875	0.125316	4.34802	1.37374e-05	0.000239184
si:ch211-214j24.10	1146.77	0.592264	0.136238	4.34729	1.37831e-05	0.000239597
sfrp1a	92.5104	-1.43705	0.330596	-4.34686	1.38101e-05	0.000239683
shdb	191.657	-1.07832	0.248153	-4.34538	1.39036e-05	0.000240921
ubp1	83.9022	1.3163	0.303172	4.34176	1.41347e-05	0.000244538
dkc1	7200.38	-0.458322	0.105578	-4.34105	1.41801e-05	0.000244933
pgrmc1	2986.47	0.63672	0.146741	4.33908	1.43078e-05	0.000246747
ugcg	403.08	0.786958	0.181421	4.33776	1.43944e-05	0.000247849
yaf2	1290.4	0.530153	0.122249	4.33665	1.44671e-05	0.000248705
p3h4	87.1682	-1.35532	0.312951	-4.33078	1.48582e-05	0.000255027
sulf1	671.777	0.765017	0.176685	4.32982	1.49231e-05	0.000255736
sdr16c5a	250.729	-0.950004	0.219549	-4.32706	1.5111e-05	0.000258549
psap	3433.66	0.802994	0.185593	4.32663	1.51408e-05	0.000258653
nabp1a	620.467	-0.763949	0.176625	-4.32526	1.52353e-05	0.000259859
tbl2	806.14	0.625564	0.144696	4.32329	1.53718e-05	0.000261778
snrnp40	2126.97	0.551132	0.127513	4.32218	1.54498e-05	0.000262695
ash2l	2142.07	0.508089	0.117654	4.31849	1.57098e-05	0.0002667
ghra	160.124	-1.30272	0.301754	-4.31718	1.58037e-05	0.000267875
mapkapk3	142.504	-1.28437	0.297644	-4.31511	1.59521e-05	0.000269969
si:dkey-40c11.1	36.8357	-2.061	0.478033	-4.31142	1.6221e-05	0.000274094
hoxc9a	300.429	-1.17536	0.272723	-4.30971	1.63472e-05	0.000275763
ciao1	855.266	0.567519	0.131694	4.30939	1.63704e-05	0.000275763
hey1	89.8247	-2.75884	0.640903	-4.30462	1.67276e-05	0.000280477
ppp1r14aa	21.5471	-4.96185	1.15252	-4.30523	1.66816e-05	0.000280477
hoxd3a	180.467	-1.15483	0.268262	-4.30485	1.67095e-05	0.000280477
zgc:171490	23.115	-5.79886	1.34746	-4.30354	1.6809e-05	0.000281409
si:ch211-191i18.2	1724.77	-0.830851	0.19314	-4.30181	1.69408e-05	0.000283179
atp2b1a	2767.55	0.643021	0.149534	4.30015	1.7068e-05	0.000284868
ywhag1	20.9365	-3.21474	0.747705	-4.29947	1.71206e-05	0.000285309
pdgfrl	11.4841	-6.27749	1.46054	-4.29805	1.72308e-05	0.000286705
si:dkey-16n15.3	210.787	1.1266	0.262361	4.29408	1.75423e-05	0.000291443
gp1bb	95.5476	1.28434	0.299336	4.29065	1.78152e-05	0.000295526
psmb2	1745.93	0.506199	0.117987	4.29028	1.78446e-05	0.000295564
gdf3	2457.42	-1.0169	0.237091	-4.28904	1.79446e-05	0.000296767
nop56	7012.71	-0.521499	0.121605	-4.28846	1.79915e-05	0.000297091
lfng	3051.09	-0.542775	0.126613	-4.28687	1.81209e-05	0.000298776
hnf1ba	41.8353	-1.96091	0.457611	-4.2851	1.82656e-05	0.000300705
pcolce2b	63.6409	-1.81998	0.42504	-4.2819	1.85308e-05	0.00030461
cwc27	534.744	-0.605808	0.14153	-4.28042	1.86544e-05	0.000305718
rnf2	2250.04	0.492923	0.115152	4.28063	1.86368e-05	0.000305718
tuba8l3	14.7179	-6.64113	1.55255	-4.27757	1.88947e-05	0.000309191
txndc12	2119.89	0.490708	0.114832	4.27327	1.92624e-05	0.000314736
klf7a	18.0763	-3.79067	0.887587	-4.27076	1.94808e-05	0.000317826
cpm	23.7566	-3.89083	0.91178	-4.26729	1.97861e-05	0.000322324
tmem59	194.682	-0.91737	0.215008	-4.26668	1.98399e-05	0.000322717
igbp1	847.111	0.566363	0.132753	4.2663	1.98741e-05	0.000322791
tldc1	73.3222	-1.40856	0.330317	-4.26428	2.0055e-05	0.000325213
hoxb9a	272.434	-1.39815	0.327899	-4.26397	2.0083e-05	0.000325213
llgl1	171.92	-1.31272	0.308086	-4.2609	2.03608e-05	0.000329222
rc3h1	59.1659	1.65857	0.389791	4.25503	2.09025e-05	0.000336979
foxp1b	39.864	-2.52796	0.594105	-4.25508	2.08971e-05	0.000336979
cd99l2	1342.79	0.655568	0.154131	4.25333	2.10614e-05	0.000339039
stxbp1a	20.1852	-3.24855	0.764178	-4.25104	2.12779e-05	0.000342019
sep15	3515.54	0.563062	0.13263	4.24535	2.18252e-05	0.000350298
spred1	337.326	-0.750138	0.177044	-4.23701	2.26514e-05	0.000363023
zcchc4	24.4315	-2.47145	0.583735	-4.23386	2.29718e-05	0.000367617
zgc:194210	40.6033	2.16881	0.512366	4.23293	2.30662e-05	0.000368333
g2e3	1537.36	0.5451	0.128791	4.23243	2.31181e-05	0.000368333
rrm2b	190.977	-0.989456	0.233777	-4.23249	2.31121e-05	0.000368333
zgc:101783	69.79	-1.60228	0.379072	-4.22684	2.36991e-05	0.000377038
itgb5	443.202	-0.698417	0.165307	-4.22496	2.38984e-05	0.000379654
phf20b	632.083	-0.636766	0.150788	-4.22293	2.41145e-05	0.000382527
foxd3	25.0534	-5.93718	1.4065	-4.22124	2.42965e-05	0.000384854
ascl1a	19.3789	-6.17527	1.46304	-4.22086	2.43376e-05	0.000384944
cyp2v1	62.5708	-1.44286	0.342406	-4.21389	2.51014e-05	0.000396449
ube2kb	455.134	0.627255	0.14904	4.20864	2.56914e-05	0.000405179
ptena	868.767	0.575324	0.136721	4.20803	2.57607e-05	0.000405685
stx2a	84.7634	1.36712	0.325017	4.20632	2.59566e-05	0.000408179
aggf1	253.311	-0.903348	0.214893	-4.2037	2.62584e-05	0.000412328
hdac4	140.906	-1.48293	0.352814	-4.20316	2.63211e-05	0.000412718
pip5k1ab	220.759	1.06216	0.253027	4.19782	2.69494e-05	0.000421962
nif3l1	91.6976	-1.43851	0.342743	-4.19707	2.70395e-05	0.000422764
kbtbd8	1055.54	1.06268	0.253351	4.1945	2.73479e-05	0.000425751
zgc:114119	969.23	0.562759	0.134161	4.19465	2.73288e-05	0.000425751
eif2s1b	1247.06	0.602064	0.143522	4.19492	2.72972e-05	0.000425751
hist2h2l	400.737	1.47375	0.351492	4.19283	2.75502e-05	0.000428287
tmem237b	108.796	-1.05816	0.252462	-4.19137	2.7728e-05	0.000430437
rassf8b	339.251	-1.07562	0.256946	-4.18619	2.83681e-05	0.000439746
ano10a	42.8778	-2.10218	0.502265	-4.18539	2.84672e-05	0.000440029
rhoaa	4190.73	0.622434	0.148705	4.18569	2.84296e-05	0.000440029
gcc1	680.538	0.640518	0.15308	4.18422	2.86148e-05	0.000441682
hoxa1a	14.8589	-4.40511	1.05323	-4.18247	2.88364e-05	0.000443843
mpdu1b	210.906	-0.956148	0.228599	-4.18264	2.88149e-05	0.000443843
si:ch211-191d15.2	1367.76	0.745408	0.178447	4.17721	2.95111e-05	0.000453587
rnf115	827.449	0.642067	0.153753	4.17597	2.96719e-05	0.000455415
rgs3a	58.2769	-2.10173	0.503337	-4.17558	2.97225e-05	0.000455549
ezh2	1567.97	0.64863	0.155393	4.17413	2.99132e-05	0.000457828
slc2a12	40.0203	-1.80964	0.433694	-4.17263	3.01106e-05	0.000460201
foxc1b	55.9046	-1.77428	0.425436	-4.17049	3.03949e-05	0.000463895
aanat2	156.211	-1.35013	0.323863	-4.16883	3.06161e-05	0.000465965
pwp1	708.25	-0.865103	0.207515	-4.16888	3.06099e-05	0.000465965
vrk2	34.7586	-1.85382	0.444997	-4.16591	3.10113e-05	0.000471319
spag7	558.445	-0.696278	0.167167	-4.16515	3.11147e-05	0.000472232
rhoua	167.888	-1.42505	0.342349	-4.16255	3.14713e-05	0.000476978
draxin	18.8981	-5.49394	1.32035	-4.16098	3.16882e-05	0.000479597
ss18	1388.02	0.597278	0.143787	4.15391	3.26845e-05	0.000493989
si:dkey-91m11.5	25.6235	-2.80864	0.676288	-4.15303	3.28108e-05	0.000495211
igf2b	23.8225	-6.43961	1.55161	-4.15027	3.32082e-05	0.000500354
kctd5a	1945.78	0.501419	0.120832	4.14971	3.32895e-05	0.000500354
chmp4bb	930.547	0.579475	0.139637	4.14987	3.32665e-05	0.000500354
gnai2b	270.156	0.857899	0.206784	4.14877	3.34271e-05	0.000501729
rhoub	96.9538	-1.66588	0.401591	-4.14819	3.35113e-05	0.0005023
snip1	1246.97	0.520424	0.125534	4.14569	3.38787e-05	0.000507109
slc6a16b	300.807	0.714154	0.172345	4.14374	3.4169e-05	0.000510195
msna	6208.99	0.516698	0.124696	4.14367	3.41786e-05	0.000510195
slc39a9	444.93	0.623938	0.150657	4.14144	3.45127e-05	0.000514475
pdgfrb	52.0973	2.05105	0.495497	4.13937	3.48256e-05	0.000517722
sf3a2	3806.26	0.523889	0.126557	4.13954	3.48009e-05	0.000517722
zgc:165555	43.8715	1.83427	0.443213	4.13858	3.49468e-05	0.000518815
tpbgl	237.278	1.32463	0.32025	4.13623	3.53052e-05	0.000523421
cyb5r3	41.039	-1.66838	0.403441	-4.13537	3.54388e-05	0.000524687
ints6	340.415	-1.13022	0.273368	-4.13444	3.55815e-05	0.000526083
ube2g1a	1876.3	0.540184	0.130669	4.13398	3.56534e-05	0.000526431
sall3b	12.9369	-5.53977	1.34021	-4.13349	3.57289e-05	0.000526831
arhgef1b	342.019	-0.94738	0.229322	-4.13122	3.6085e-05	0.000531362
brf1a	48.59	-1.97011	0.477102	-4.12932	3.63838e-05	0.000535038
scocb	937.789	0.61611	0.149228	4.12865	3.64896e-05	0.00053587
hadh	431.16	0.712154	0.172792	4.12146	3.76477e-05	0.000550775
srp54	3184.79	0.484347	0.11752	4.12141	3.76564e-05	0.000550775
zcchc17	747.441	0.573272	0.13909	4.1216	3.76255e-05	0.000550775
bmp7b	27.5935	-3.26089	0.791736	-4.11866	3.81086e-05	0.000556642
ptp4a1	6835.66	0.834696	0.202765	4.11656	3.84566e-05	0.000560971
phc2a	643.34	-0.732597	0.178003	-4.11565	3.86096e-05	0.00056245
sst1.1	110.824	-2.20811	0.536755	-4.11382	3.89158e-05	0.000565719
zgc:86709	45.829	-4.75512	1.15592	-4.11369	3.8938e-05	0.000565719
ndufv1	1008.3	0.699685	0.170131	4.11261	3.91204e-05	0.000567611
bmp3	1240.68	-1.59153	0.387236	-4.10997	3.95716e-05	0.000573393
fam32a	1330.37	0.633802	0.154224	4.10963	3.9629e-05	0.000573461
ca10a	14.27	-3.24727	0.79036	-4.1086	3.98065e-05	0.000575265
nipa2	741.134	0.696147	0.169505	4.10694	4.00944e-05	0.000578657
stk11	1014.56	0.514091	0.125245	4.10468	4.0487e-05	0.000583549
pdlim4	176.117	-2.0209	0.492391	-4.10425	4.05635e-05	0.000583879
slc35e4	16.5924	-3.05575	0.744899	-4.10223	4.0918e-05	0.000588203
rasl11a	76.6818	-1.58267	0.385905	-4.10121	4.11004e-05	0.000590045
ccm2	168.091	1.10012	0.268303	4.10028	4.12649e-05	0.000591626
dnaja2	3183.09	0.513786	0.125395	4.09733	4.17944e-05	0.00059843
s100v2	108.419	1.25989	0.307542	4.09663	4.19206e-05	0.000599449
etv4	349.47	-0.841246	0.20537	-4.09626	4.19884e-05	0.00059963
sart1	2889.35	0.502694	0.12302	4.08627	4.38361e-05	0.000625195
si:ch211-198a12.6	3601.18	0.548824	0.134333	4.08555	4.3972e-05	0.000626313
ube2l3a	1655.66	0.62417	0.152852	4.08349	4.4364e-05	0.000630246
ube2nb	2682.17	0.540753	0.132417	4.08371	4.43215e-05	0.000630246
ndufa8	685.881	0.677821	0.166058	4.08182	4.46839e-05	0.000633963
zgc:174153	786.57	-7.82332	1.91726	-4.08047	4.4945e-05	0.000636579
adgrg1	21.6012	-4.04623	0.991659	-4.08026	4.49852e-05	0.000636579
rnf8	439.846	0.701947	0.172061	4.07963	4.51066e-05	0.000637061
angptl6	53.1869	-2.39879	0.588012	-4.07948	4.51364e-05	0.000637061
glyr1	2287.55	0.465445	0.114158	4.0772	4.55813e-05	0.000642507
ta	210.699	-4.28834	1.05186	-4.0769	4.56405e-05	0.000642509
mlx	456.432	0.808855	0.198506	4.07472	4.60705e-05	0.000647725
tgfb3	159.042	2.01326	0.494229	4.07355	4.63027e-05	0.000649316
bcas2	3323.26	0.640645	0.15727	4.07354	4.6303e-05	0.000649316
irf8	10.1113	-7.08079	1.73961	-4.07032	4.69479e-05	0.000657513
tshz1	411.499	-0.628363	0.154411	-4.06941	4.7133e-05	0.000659257
mcm3	6325.3	-0.657358	0.161648	-4.0666	4.77045e-05	0.000666394
ufsp2	51.7621	-2.01569	0.496113	-4.06297	4.84526e-05	0.000675976
ca8	44.7576	-3.06173	0.753631	-4.06264	4.85201e-05	0.000676051
ccbe1	7.4972	-6.64995	1.63714	-4.06192	4.86709e-05	0.000677285
zgc:55262	48.6126	-1.63507	0.402921	-4.05806	4.94829e-05	0.000687705
mvb12ba	209.173	0.799442	0.197166	4.05467	5.02041e-05	0.000696838
zgc:56596	648.219	0.666466	0.164475	4.05208	5.07647e-05	0.000703722
srp14	1066.61	0.517771	0.127789	4.05177	5.08325e-05	0.000703765
pwp2h	1416.73	-0.47377	0.116951	-4.051	5.09991e-05	0.000705174
emc3	1720.32	0.527316	0.130302	4.04688	5.19038e-05	0.000716773
slc31a2	21.985	-3.4372	0.850667	-4.04059	5.33171e-05	0.000735356
eepd1	51.7136	1.86614	0.462012	4.03917	5.36403e-05	0.000738879
zfyve27	661.884	0.587448	0.145467	4.03836	5.38265e-05	0.000739225
mboat2b	98.342	-1.19196	0.295141	-4.0386	5.37703e-05	0.000739225
myod1	50.8174	-2.89876	0.71784	-4.03817	5.38693e-05	0.000739225
ctnnbip1	1989.62	0.562302	0.139267	4.0376	5.40014e-05	0.000740105
rrnad1	59.512	-1.42291	0.352509	-4.03653	5.42466e-05	0.000742531
tmem33	1156.61	0.541118	0.134127	4.03438	5.47464e-05	0.00074843
jag1a	38.5913	-2.54899	0.631918	-4.03373	5.48978e-05	0.000749257
galm	56.4963	-2.37596	0.589053	-4.03352	5.49479e-05	0.000749257
pgam1a	102.625	-1.4369	0.356265	-4.03324	5.50134e-05	0.000749257
atf7ip	2660.53	-0.624474	0.154923	-4.03087	5.55699e-05	0.00075589
zgc:77486	150.096	0.974211	0.24172	4.03033	5.56977e-05	0.000756682
cxxc1b	302.45	0.810985	0.201261	4.02953	5.58891e-05	0.000758336
ghitm	752.292	0.597254	0.148252	4.02865	5.6099e-05	0.000760236
zgc:114200	686.772	0.631069	0.156683	4.02767	5.63317e-05	0.000761492
pmp22b	306.861	-1.09871	0.272777	-4.02785	5.62881e-05	0.000761492
relt	274.368	0.886256	0.220379	4.02152	5.78247e-05	0.000780705
sox11b	1950.4	0.639601	0.159107	4.01995	5.82113e-05	0.00078398
efemp2b	51.5308	-1.71108	0.425628	-4.02012	5.81679e-05	0.00078398
aurkaip1	1138.35	0.677362	0.168518	4.01951	5.83189e-05	0.000784458
tcf7	356.536	1.24313	0.309444	4.01731	5.88653e-05	0.00079083
zgc:165409	505.445	0.973884	0.242537	4.01541	5.9343e-05	0.000794306
ndufs5	652.646	0.644048	0.160372	4.01595	5.92068e-05	0.000794306
ptch1	61.357	1.37454	0.342309	4.01549	5.93229e-05	0.000794306
zgc:110716	46.7658	1.99162	0.496399	4.01214	6.01713e-05	0.000804403
acad11	91.0045	-1.50217	0.374435	-4.01184	6.02476e-05	0.000804435
smad6	1245.43	1.47773	0.368398	4.01122	6.04065e-05	0.000805568
btbd11a	35.2253	-2.00277	0.499468	-4.0098	6.07697e-05	0.000809419
erh	3126.17	0.631029	0.157395	4.0092	6.09261e-05	0.000809521
rab11ba	973.44	0.585805	0.146106	4.00944	6.08622e-05	0.000809521
mplkip	693.125	0.762792	0.190299	4.0084	6.11328e-05	0.000811277
si:dkeyp-55f12.3	299.582	0.890468	0.222192	4.00764	6.1328e-05	0.000812877
hspd1	738.054	-0.65243	0.16283	-4.00682	6.15421e-05	0.000814721
quo	156.525	-1.9156	0.478241	-4.00552	6.18822e-05	0.000818229
rhogc	1205.43	0.558242	0.139509	4.00147	6.29511e-05	0.000831352
gapdh	694.44	0.793072	0.198288	3.99959	6.3452e-05	0.000835938
znf1001	374.066	0.859074	0.214788	3.99963	6.34411e-05	0.000835938
slit2	34.0527	-2.60511	0.651472	-3.99881	6.36613e-05	0.000836946
psmd13	3907.6	0.623207	0.155851	3.99873	6.36824e-05	0.000836946
her15.1	224.856	-4.97484	1.24451	-3.99742	6.40358e-05	0.000840576
cx36.7	48.218	-9.34242	2.33729	-3.99711	6.41212e-05	0.000840683
aagab	456.76	0.746182	0.186802	3.99452	6.48256e-05	0.000847875
nudt1	129.292	-0.944908	0.236535	-3.99479	6.47515e-05	0.000847875
hk2	77.2707	-2.16248	0.541926	-3.99036	6.59739e-05	0.000861859
hoxb8a	263.786	-1.05054	0.263421	-3.98804	6.66201e-05	0.000869256
igsf21b	22.2791	-2.35646	0.591133	-3.98635	6.70982e-05	0.000874446
pcdh18b	59.1282	-2.97836	0.747226	-3.98589	6.72265e-05	0.00087507
rrbp1b	1060.32	-0.510891	0.128331	-3.98105	6.86118e-05	0.000890013
tcn2	44.7951	-1.72344	0.432914	-3.98102	6.86198e-05	0.000890013
arrb2b	2158.1	0.58486	0.1469	3.98136	6.85225e-05	0.000890013
thoc1	1090.02	0.501237	0.125956	3.97947	6.90705e-05	0.000894791
col5a3a	47.8744	-8.3662	2.10269	-3.97881	6.92613e-05	0.000895957
itfg2	118.362	-0.980066	0.246335	-3.97859	6.93251e-05	0.000895957
med17	665.17	0.641358	0.161215	3.97829	6.94136e-05	0.000896036
tenm4	26.9066	-2.90402	0.730171	-3.97718	6.97385e-05	0.000897953
abi2b	941.981	0.571378	0.143661	3.97726	6.97151e-05	0.000897953
ska3	508.868	0.936617	0.235512	3.97693	6.98096e-05	0.000897953
meis2b	2235.38	-0.558683	0.140544	-3.97516	7.03327e-05	0.000903614
eif3m	3427.79	0.495127	0.124575	3.97453	7.05183e-05	0.000904574
setd6	122.092	-1.93554	0.487008	-3.97434	7.05738e-05	0.000904574
ikzf1	11.6692	-6.31213	1.58967	-3.97072	7.16554e-05	0.000917358
slc25a3b	7509.51	0.60102	0.151429	3.96899	7.21765e-05	0.000922943
zgc:153219	125.982	1.07513	0.270907	3.96864	7.22836e-05	0.000923228
zeb2a	575.689	-1.03423	0.260697	-3.96718	7.27272e-05	0.000927804
f11r.1	429.438	0.808521	0.203848	3.96628	7.30021e-05	0.000930222
hnrpkl	1499.39	-1.34299	0.338819	-3.96373	7.37862e-05	0.000939113
smu1a	2919.68	0.451811	0.114128	3.95879	7.53303e-05	0.000957645
dennd2da	17.5344	-4.60595	1.16373	-3.95792	7.56065e-05	0.000960036
vamp5	81.6264	-1.47837	0.373593	-3.95715	7.58487e-05	0.000961988
ppm1da	1103.62	0.647125	0.163629	3.95484	7.65851e-05	0.000969141
smyhc2	27.5972	-5.28302	1.33584	-3.95482	7.65908e-05	0.000969141
ech1	167.722	-0.887586	0.224465	-3.95423	7.67826e-05	0.000969313
prkrip1	452.497	0.681226	0.172268	3.95445	7.67122e-05	0.000969313
neurl1aa	127.427	-1.478	0.373809	-3.95389	7.6892e-05	0.00096957
acta1a	693.756	-4.45542	1.12764	-3.95109	7.77951e-05	0.000979822
abca1a	97.0369	-1.35554	0.34318	-3.94995	7.81683e-05	0.000983384
anp32b	5350.21	-0.458173	0.116015	-3.94925	7.83955e-05	0.000983967
asap2a	31.2594	1.92393	0.487156	3.94932	7.83726e-05	0.000983967
psmd3	3686.84	0.538786	0.136581	3.9448	7.98673e-05	0.00100129
spry2	837.876	-1.6397	0.415737	-3.94409	8.01049e-05	0.00100268
rxrbb	35.3939	2.03875	0.516937	3.94391	8.01626e-05	0.00100268
mrpl37	1075.34	0.545695	0.138392	3.94312	8.04289e-05	0.00100485
aldh16a1	91.6526	-1.30743	0.331606	-3.94272	8.05631e-05	0.00100538
odf2b	591.231	0.627194	0.159155	3.94077	8.122e-05	0.00101241
naa20	735.987	0.539588	0.136962	3.9397	8.1582e-05	0.00101576
gfra3	20.4295	-2.58506	0.656378	-3.93837	8.20361e-05	0.00101801
celf4	168.898	-6.47259	1.64333	-3.9387	8.19233e-05	0.00101801
gnai1	656.957	0.578819	0.14697	3.93835	8.20435e-05	0.00101801
hint1	602.718	0.562599	0.142905	3.93688	8.25486e-05	0.00102311
stard3	429.387	0.76168	0.193559	3.93512	8.31536e-05	0.00102944
ndufa9a	665.434	0.584518	0.148634	3.93261	8.40271e-05	0.00103907
triqk	25.3688	-2.28229	0.580395	-3.93231	8.41349e-05	0.00103922
rasl11b	172.303	1.17097	0.297823	3.93176	8.43267e-05	0.00104041
zgc:66443	681.885	0.573749	0.145943	3.93132	8.44816e-05	0.00104114
msxd	139.953	1.47735	0.375919	3.92995	8.49621e-05	0.00104588
smarcb1b	1753.09	0.629554	0.16029	3.92759	8.58031e-05	0.00105504
tusc2b	347.671	0.721817	0.183864	3.92582	8.64351e-05	0.00106161
eif3i	2239.96	0.476937	0.12165	3.92055	8.8347e-05	0.00108387
actc1a	2149.81	-2.56239	0.654574	-3.91458	9.05608e-05	0.00110978
vdac3	642.213	0.72627	0.185548	3.91419	9.0707e-05	0.00111032
chordc1a	37.6246	-2.07053	0.529088	-3.91339	9.10079e-05	0.00111275
flrt3	1097.28	-0.98984	0.253174	-3.90972	9.24029e-05	0.00112854
fpgs	113.622	-1.40429	0.359461	-3.90667	9.35785e-05	0.00114162
pth2r	108.505	-2.48096	0.63524	-3.90555	9.40124e-05	0.00114563
si:ch211-194i10.5	611.944	0.744862	0.190778	3.90434	9.44829e-05	0.00115007
gng5	1909.57	0.600345	0.153787	3.90375	9.47119e-05	0.00115157
gpsm2	315.001	0.735949	0.188964	3.89465	9.83405e-05	0.00119435
usp13	87.1175	-2.30773	0.592758	-3.89321	9.89268e-05	0.00120014
reln	19.4888	-3.23685	0.831577	-3.89243	9.92452e-05	0.00120266
panx1a	1008.39	0.721632	0.185491	3.8904	0.000100081	0.00121143
ece1	41.5689	-1.91539	0.492456	-3.88945	0.00010047	0.0012148
ctdsp2	990.687	-0.569482	0.146444	-3.88874	0.000100766	0.00121593
ttyh2l	131.056	-2.02477	0.520682	-3.88869	0.000100787	0.00121593
pgm3	124.097	-1.23174	0.316799	-3.88809	0.000101035	0.00121757
ssu72	289.453	0.90862	0.233984	3.88325	0.000103068	0.00124069
tsfm	233.463	1.17999	0.303893	3.88291	0.000103215	0.00124109
kdrl	68.2411	-1.76951	0.455788	-3.8823	0.000103471	0.00124143
med27	930.532	0.649009	0.167165	3.88245	0.000103409	0.00124143
six3a	31.11	-4.51008	1.16207	-3.88108	0.000103992	0.0012463
atp5d	1381.45	0.762906	0.196637	3.87978	0.000104553	0.00125164
wwox	22.9752	-2.27463	0.586641	-3.87738	0.000105589	0.00126266
elovl6	39.2724	-2.82682	0.729148	-3.87687	0.000105808	0.00126388
rap1b	2375.94	-0.547606	0.141272	-3.87627	0.000106071	0.00126564
stam	950.245	0.512062	0.132301	3.87042	0.000108648	0.00129497
pou3f3a	13.2322	-6.48211	1.67519	-3.86948	0.000109066	0.00129805
ankrd10b	280.759	0.762915	0.197171	3.86931	0.000109145	0.00129805
cdk2ap2	1426.84	0.563993	0.145925	3.86495	0.000111114	0.00132002
hmg20a	323.003	0.640205	0.165667	3.86442	0.000111356	0.00132145
ywhabl	5182.16	0.672745	0.174114	3.86381	0.000111631	0.00132184
rtcb	332.577	-0.771433	0.199652	-3.86389	0.000111596	0.00132184
pitrm1	731.697	-0.7487	0.193906	-3.86115	0.000112852	0.00133485
plp1a	34.1452	-3.81549	0.988302	-3.86065	0.000113085	0.00133615
zgc:77056	568.919	-0.605969	0.157114	-3.85688	0.000114843	0.00135545
asb2b	31.4808	-2.57455	0.667596	-3.85644	0.00011505	0.00135642
tfdp2	105.983	-1.95774	0.507776	-3.85553	0.000115481	0.00136002
wu:fa26c03	677.202	-7.29509	1.89245	-3.85483	0.000115808	0.00136241
vrk1	1419.94	0.589834	0.153032	3.85432	0.00011605	0.00136378
eml2	32.6246	-2.06955	0.537054	-3.85351	0.000116435	0.00136683
trim35-27	23.0128	2.2838	0.592813	3.85247	0.00011693	0.00137019
gbas	1084.01	0.641555	0.166535	3.85238	0.000116974	0.00137019
nop14	501.904	0.688355	0.178733	3.85129	0.000117496	0.00137483
zgc:64106	23.9577	-2.87832	0.747997	-3.84803	0.000119069	0.00139174
luc7l	1855.23	0.454261	0.118126	3.84557	0.000120274	0.00140431
fxr2	1356.01	-0.580794	0.151095	-3.84389	0.000121099	0.00141243
klhl24a	124.506	-1.55146	0.403706	-3.84305	0.000121512	0.00141574
bcl7a	2698.76	0.474718	0.123569	3.84172	0.000122173	0.00142191
aplnrb	244.606	1.71039	0.445432	3.83985	0.000123109	0.00143127
sept6	3386.95	0.538076	0.140156	3.83913	0.000123473	0.00143397
oc90	95.7533	-1.86556	0.486241	-3.83669	0.000124703	0.00144672
parvaa	143.596	-1.64337	0.428414	-3.83593	0.000125089	0.00144964
zgc:152857	21.5321	2.84474	0.742045	3.83365	0.000126255	0.0014616
vipr1b	47.3346	-1.6098	0.420415	-3.82908	0.000128625	0.0014843
ndufb4	726.817	0.626212	0.163537	3.82917	0.000128578	0.0014843
eif3g	4674.76	0.446771	0.116678	3.8291	0.000128615	0.0014843
lsm7	2475.47	-0.579642	0.151458	-3.82707	0.000129675	0.00149484
rspo2	15.2214	-3.92024	1.02499	-3.82465	0.000130958	0.00150484
puf60b	5575.6	0.439754	0.114977	3.8247	0.000130931	0.00150484
slc16a1	1357.2	0.914252	0.23901	3.82516	0.000130687	0.00150484
sap18	3505.01	0.734666	0.192101	3.82437	0.000131107	0.00150497
plekhh1	189.363	-1.12155	0.293362	-3.82308	0.000131795	0.00151127
atad1b	408.895	0.661761	0.173161	3.82164	0.000132565	0.0015148
clic2	200.221	-3.84308	1.00566	-3.82147	0.00013266	0.0015148
si:dkey-15h8.11	493.248	0.67271	0.176032	3.82153	0.000132628	0.0015148
ncs1a	49.7057	-2.59834	0.679903	-3.82164	0.00013257	0.0015148
fam222ba	244.639	-1.66113	0.435286	-3.81618	0.000135535	0.00154601
tob1a	344.257	-1.5994	0.419181	-3.81554	0.000135884	0.00154837
zgc:173552	120.418	1.26064	0.330499	3.81435	0.000136541	0.00155422
hsp90aa1.2	196.907	-3.71172	0.9735	-3.81275	0.000137427	0.00156267
oaz1a	11602.8	0.454154	0.119125	3.81241	0.000137618	0.00156321
eva1ba	15.2442	-3.53379	0.92714	-3.8115	0.000138129	0.00156738
otx1a	30.944	-3.55244	0.932394	-3.81002	0.000138954	0.0015751
ccdc47	1698.54	0.437735	0.114907	3.80947	0.000139265	0.00157535
cdh1	496.244	-0.96639	0.253666	-3.8097	0.000139137	0.00157535
tnfaip8l3	12.2929	-3.85126	1.01117	-3.80873	0.000139681	0.00157841
ptp4a3	424.25	-0.749427	0.196799	-3.80808	0.000140049	0.00158093
cdh17	6.31347	-6.38508	1.67703	-3.80737	0.000140451	0.00158383
anxa4	236.087	-3.25148	0.854194	-3.80649	0.000140953	0.00158783
gps1	1164.93	0.607537	0.159692	3.80444	0.000142126	0.0015994
smyd3	34.4962	-1.8803	0.49448	-3.80258	0.000143198	0.0016098
brinp3a	104.278	1.3039	0.342953	3.80199	0.000143539	0.00161197
cd82a	74.1482	-2.35512	0.619485	-3.80173	0.000143689	0.00161198
tipin	543.625	0.625562	0.164577	3.80103	0.000144097	0.0016149
sgcd	15.7725	-3.15588	0.830717	-3.79898	0.000145295	0.00162229
sulf2b	18.618	-5.45002	1.43447	-3.79934	0.000145083	0.00162229
zgc:153867	2480.87	0.404468	0.10647	3.79888	0.000145353	0.00162229
gli3	89.5832	-1.14752	0.302036	-3.79927	0.000145124	0.00162229
dcps	876.43	0.725744	0.191069	3.79833	0.000145673	0.00162253
psma3	6278.93	0.500627	0.131801	3.79836	0.000145659	0.00162253
hbegfa	54.3688	-2.99866	0.789757	-3.79694	0.000146492	0.00162998
tm2d3	512.706	0.663153	0.174689	3.7962	0.000146933	0.00163156
dlb	28.463	-4.02387	1.05995	-3.79629	0.000146879	0.00163156
kcnk5b	124.818	-1.00778	0.265623	-3.79402	0.000148226	0.00164256
ek1	20.6023	-4.57832	1.20672	-3.79403	0.000148219	0.00164256
cox7a3	654.291	0.575539	0.151718	3.79347	0.000148557	0.00164455
rpn2	3897.81	-0.610647	0.161029	-3.79215	0.00014935	0.00165165
ctr9	3265.14	0.495447	0.130678	3.79135	0.000149828	0.00165526
tbpl1	411.734	0.721914	0.190546	3.78867	0.000151458	0.00167156
bmp2a	326.983	-0.749716	0.197944	-3.78752	0.000152156	0.00167757
rab18a	652.782	0.661033	0.174544	3.78719	0.000152358	0.0016781
arhgap11a	1417.81	0.512075	0.135329	3.78393	0.000154374	0.00169858
ddx1	167.872	-0.79505	0.210285	-3.78082	0.000156311	0.00171816
lama4	12.9742	-4.93545	1.30608	-3.77882	0.000157571	0.00173026
zp3.2	114.941	1.02583	0.271517	3.77816	0.000157993	0.00173233
tcf12	1598.12	1.13536	0.300517	3.77802	0.000158078	0.00173233
zgc:66160	299.66	0.715375	0.189377	3.77753	0.000158394	0.00173405
polm	55.4651	1.51777	0.401829	3.77716	0.000158625	0.00173484
her2	192.603	-5.00488	1.32683	-3.77207	0.000161897	0.00176884
papolg	1713.48	0.426189	0.113041	3.77021	0.000163113	0.00178034
sec11a	1234.14	0.52151	0.138384	3.76856	0.000164193	0.00178854
snap29	86.7864	1.42872	0.379103	3.76869	0.000164105	0.00178854
cdc37	1457.82	0.513405	0.136278	3.76733	0.000165006	0.00179559
gtse1	939.337	0.669359	0.17775	3.76574	0.000166059	0.00180525
nat10	1950.16	-0.498458	0.132418	-3.76429	0.000167025	0.00181033
foxa3	30.6422	-2.82007	0.749144	-3.76438	0.00016696	0.00181033
emc10	850.628	0.506602	0.13458	3.76432	0.000167003	0.00181033
pikfyve	98.7246	-1.26343	0.335681	-3.76377	0.000167371	0.00181227
atp6v0e1	449.647	0.747065	0.19851	3.76337	0.000167642	0.0018134
zgc:154164	62.1825	1.49489	0.397305	3.76257	0.000168178	0.00181739
dhodh	394.151	0.685601	0.18229	3.76106	0.000169197	0.00182659
rbbp5	1326.79	0.480728	0.127829	3.7607	0.000169437	0.00182737
med19a	751.346	0.59042	0.157008	3.76045	0.00016961	0.00182742
zgc:174623	209.241	1.02415	0.272479	3.75864	0.000170837	0.00183882
nfe2l1b	210.572	0.782103	0.208145	3.75748	0.00017163	0.00184553
uqcrq	240.524	0.864546	0.230151	3.75644	0.00017235	0.00185145
snw1	2262.8	0.543916	0.144819	3.75583	0.000172771	0.00185414
spon1b	50.3522	-1.6969	0.451895	-3.75508	0.000173284	0.00185781
ndufaf5	179.767	-1.04202	0.277673	-3.7527	0.000174938	0.0018737
LOC100333064	760.99	0.667259	0.177821	3.75242	0.000175137	0.00187398
wnt11r	520.685	-0.967988	0.25804	-3.75131	0.00017591	0.00188041
pkma	94.7356	1.34951	0.359832	3.75038	0.000176567	0.00188558
rbm28	1907.83	-0.39326	0.104891	-3.74924	0.000177374	0.00189234
tfg	2075.88	0.52598	0.140301	3.74893	0.000177588	0.00189276
opn1sw2	16.169	2.8829	0.769092	3.74845	0.00017793	0.00189456
gas1a	1261.5	-0.492908	0.131553	-3.74684	0.000179076	0.00190303
srpk1a	755.757	0.691744	0.184619	3.74687	0.000179054	0.00190303
psmb1	3859.37	0.494813	0.132112	3.74542	0.000180094	0.00191199
LOC556846	716.595	0.665077	0.177708	3.74253	0.000182176	0.0019322
pak6b	70.2466	-2.51792	0.672856	-3.74213	0.000182467	0.00193331
slc17a9b	334.35	-0.702399	0.187712	-3.7419	0.000182636	0.00193331
psma6a	1791.9	0.520766	0.139268	3.73932	0.000184519	0.00195134
cdc42	3142.37	0.495647	0.132606	3.73773	0.000185693	0.00196185
eef2k	185.387	-1.04197	0.278932	-3.73557	0.000187289	0.00197679
tmem88a	1262.61	-0.698485	0.187113	-3.73296	0.000189239	0.00198945
ap1s2	1307.98	0.512549	0.137326	3.73236	0.000189696	0.00198945
sdha	1110.23	0.506209	0.135601	3.73308	0.000189151	0.00198945
st6galnac3	44.3935	-1.67637	0.449118	-3.73259	0.000189524	0.00198945
nr6a1b	85.3081	-1.09073	0.292162	-3.73331	0.000188976	0.00198945
pa2g4b	2349.17	-0.598729	0.160406	-3.73258	0.000189525	0.00198945
si:dkey-174n20.1	48.8787	-1.5225	0.40793	-3.73226	0.000189768	0.00198945
pms1	108.494	-1.07574	0.288301	-3.73131	0.000190487	0.00199507
si:ch73-208g10.1	137.434	1.05184	0.281939	3.73073	0.000190926	0.00199774
stk38a	207.293	1.15516	0.309898	3.72755	0.000193349	0.00201922
hibch	419.699	-0.599249	0.16076	-3.72759	0.000193316	0.00201922
rnf13	185.496	-0.843277	0.226348	-3.72558	0.000194867	0.00203312
wee1	1116.02	-0.467207	0.12543	-3.72483	0.000195448	0.00203723
agpat4	220.137	-0.832981	0.223708	-3.72351	0.000196472	0.00204594
tceb1b	1700.49	0.526862	0.141539	3.72239	0.000197344	0.00205305
lin37	550.37	0.641935	0.172526	3.72079	0.000198597	0.00206412
syf2	804.568	0.499249	0.134299	3.71746	0.000201239	0.00208863
rnf14	50.1226	-1.37722	0.370485	-3.71733	0.000201339	0.00208863
nr2f6b	728.741	-0.527198	0.141845	-3.71671	0.000201835	0.00208978
si:dkey-4c15.14	150.716	0.917245	0.246781	3.71684	0.000201734	0.00208978
acot9.2	15.5594	-2.82802	0.761048	-3.71595	0.000202442	0.00209409
mob4	722.533	0.795677	0.214141	3.71568	0.000202662	0.00209436
fxyd6l	1012.09	-0.72249	0.194478	-3.71502	0.000203187	0.0020978
pdzrn4	32.053	-3.1851	0.857779	-3.7132	0.000204656	0.00211096
tmed7	506.009	0.634469	0.170895	3.71263	0.000205117	0.00211371
her11	125.721	-1.20037	0.323441	-3.71124	0.000206249	0.00212336
b3gnt7	527.294	-3.87485	1.04453	-3.70966	0.000207541	0.00213465
gfap	11.1983	-6.23913	1.68234	-3.70861	0.000208399	0.00214145
fut11	651.885	0.69492	0.187498	3.70628	0.00021033	0.00215722
zgc:113176	433.9	0.65949	0.177929	3.70648	0.000210156	0.00215722
hk1	2038.47	0.519337	0.140163	3.70524	0.00021119	0.00216401
siae	96.4508	-1.11387	0.300695	-3.70431	0.000211967	0.00216992
sox21b	15.725	-4.82524	1.3029	-3.70345	0.000212687	0.00217524
b9d2	161.542	0.923625	0.249454	3.70258	0.000213418	0.00218067
fam91a1	118.364	-1.11048	0.300094	-3.70043	0.000215233	0.00219716
mmd	310.746	0.888169	0.240175	3.69801	0.000217298	0.00221616
tra2b	790.671	-0.582228	0.157535	-3.69586	0.000219142	0.00223287
cdc42l	2660.43	0.659603	0.178585	3.69349	0.000221197	0.0022517
lipg	48.9697	-2.21753	0.600483	-3.69291	0.000221706	0.00225477
znf740b	498.684	0.586171	0.158799	3.69129	0.000223121	0.00226647
psmd12	3060.03	0.53992	0.146276	3.69112	0.000223273	0.00226647
ctsd	3488.55	0.488849	0.132571	3.68744	0.000226521	0.0022973
rcor1	2109.43	-0.426573	0.11572	-3.68624	0.000227594	0.00230603
bora	427.11	0.611136	0.165826	3.6854	0.000228346	0.00230721
prom2	11.5895	-4.31273	1.17014	-3.68567	0.000228101	0.00230721
fam76b	2546.32	0.387309	0.105088	3.68557	0.000228189	0.00230721
trip13	299.623	0.7564	0.205269	3.68492	0.000228772	0.00230937
h3f3b.1	3500.03	0.505852	0.137361	3.68264	0.000230827	0.00232795
irf2a	623.115	0.564479	0.153366	3.68059	0.000232696	0.00234463
tnk2b	18.9854	-3.72804	1.01298	-3.68027	0.000232985	0.00234537
acvr1l	2087.35	0.671353	0.182467	3.67931	0.000233867	0.00235207
pdcd10a	610.037	0.572562	0.15566	3.67828	0.000234812	0.0023594
rnps1	2047.83	0.456783	0.124243	3.67653	0.000236427	0.00237343
klf2a	53.6809	1.43371	0.390068	3.67554	0.000237348	0.00238048
ubl7b	414.072	0.577455	0.157137	3.67485	0.00023799	0.00238472
srrm2	2016.61	0.4779	0.130195	3.67064	0.000241943	0.0024221
gtpbp1l	208.463	0.725396	0.197683	3.66949	0.000243037	0.00243082
vapal	759.96	0.631155	0.172017	3.66913	0.000243374	0.00243195
dynlt1	91.8986	1.15948	0.316051	3.66865	0.000243831	0.00243428
pex13	606.163	0.645375	0.176011	3.66667	0.000245725	0.0024487
mmp2	433.402	-0.710758	0.193834	-3.66685	0.000245559	0.0024487
sox1b	19.8626	-4.86216	1.32632	-3.6659	0.000246472	0.00245234
zranb2	1642.18	0.652449	0.177982	3.66583	0.000246541	0.00245234
si:ch211-59d15.9	17.1708	-2.81596	0.768227	-3.66552	0.000246832	0.00245299
psmc6	5351.46	0.470835	0.128472	3.66487	0.00024746	0.00245698
tspan31	640.533	0.598495	0.163316	3.66464	0.000247691	0.00245704
fezf1	12.2619	-6.372	1.74051	-3.66099	0.000251243	0.00248774
mtmr1a	71.0512	1.58142	0.431959	3.66104	0.000251197	0.00248774
dnajc11	1428.43	0.499569	0.136495	3.65997	0.000252247	0.00249541
olig3	19.5753	-4.80158	1.31203	-3.65966	0.000252547	0.00249611
hiat1b	909.686	-0.541599	0.148026	-3.6588	0.000253396	0.00250223
lypla2	2222.4	0.508268	0.13897	3.65741	0.000254781	0.00251363
atp5j	766.808	0.557993	0.15263	3.65585	0.000256334	0.00252666
armt1	140.397	0.859167	0.235112	3.6543	0.000257889	0.00253968
lrrc57	155.815	0.935197	0.256109	3.65156	0.000260653	0.00256458
foxp4	241.468	-1.11077	0.304239	-3.65098	0.000261243	0.00256807
zgc:111986	652.76	0.903009	0.247617	3.64679	0.000265532	0.00260409
rnf180	180.13	0.852451	0.233748	3.64689	0.000265436	0.00260409
ccnh	355.703	0.707553	0.194025	3.6467	0.000265626	0.00260409
senp3a	692.033	0.499236	0.136932	3.64587	0.000266493	0.00261024
tnks1bp1	13.5851	-5.04175	1.38303	-3.64542	0.000266952	0.00261239
srl	30.6525	-4.44626	1.22075	-3.64223	0.000270284	0.00264262
lysmd3	520.445	0.628128	0.172491	3.64151	0.000271048	0.0026477
dhps	326.983	-0.626938	0.172177	-3.64124	0.000271328	0.00264806
dusp5	373.505	-4.40758	1.2108	-3.64021	0.00027242	0.00265634
rint1	193.857	-0.992562	0.272728	-3.63938	0.000273294	0.00266247
cited2	253.723	-1.04382	0.28688	-3.63851	0.00027422	0.00266911
filip1l	36.7746	-4.01518	1.10371	-3.6379	0.000274869	0.00267065
uqcrb	1090.69	0.509642	0.140087	3.63803	0.000274733	0.00267065
vps33b	80.6462	-1.10187	0.30316	-3.63462	0.000278393	0.00270247
dpysl2b	56.9122	-1.70638	0.469842	-3.63181	0.000281441	0.00272962
zgc:174888	88.1879	-2.30118	0.633794	-3.6308	0.000282541	0.00273017
spag1a	318.02	-0.862047	0.237382	-3.63147	0.000281807	0.00273017
xpr1b	276.286	-0.72883	0.200746	-3.63061	0.000282752	0.00273017
atp1b2a	207.262	-1.27791	0.351977	-3.63065	0.000282703	0.00273017
zgc:158564	261.195	0.908206	0.250106	3.63129	0.000282006	0.00273017
fgfr1b	625.042	0.71435	0.196772	3.63034	0.000283051	0.00273064
her15.2	228.259	-4.41081	1.21507	-3.63009	0.000283323	0.00273084
avd	56.392	1.55746	0.429194	3.62881	0.000284729	0.00273968
hmgb3a	9750.73	-0.671818	0.185135	-3.6288	0.000284744	0.00273968
cks2	131.62	1.35509	0.373543	3.62768	0.000285983	0.00274918
ahcyl1	27.9588	-4.12431	1.13712	-3.62698	0.000286754	0.00275415
cep68	14.7245	-2.98155	0.822165	-3.62646	0.000287331	0.00275726
ctps1a	3486.32	0.441838	0.121854	3.62596	0.000287894	0.00276023
smyhc1	390.737	-6.79985	1.87547	-3.62568	0.000288204	0.00276077
vim	39.0139	-3.04318	0.839555	-3.62476	0.000289233	0.0027682
leng8	373.417	-0.754399	0.208154	-3.62423	0.000289821	0.00277139
ntn1a	65.6886	-2.45019	0.676176	-3.6236	0.000290536	0.00277578
celf1	2508.94	-0.402797	0.111178	-3.62299	0.000291216	0.00277984
adkb	550.325	-0.692636	0.191209	-3.6224	0.000291883	0.00278376
ap2s1	1729.01	0.454583	0.125537	3.62112	0.000293331	0.00279513
gpx4a	183.535	-1.37735	0.380516	-3.61969	0.000294962	0.0028082
pdha1a	2173.73	0.549766	0.151973	3.61753	0.000297427	0.00282919
si:ch211-170d8.2	115.719	-1.36598	0.377805	-3.61558	0.000299676	0.0028481
pyroxd2	160.721	-0.833084	0.230501	-3.61424	0.000301233	0.00285939
si:ch211-157p22.10	30.403	-1.88678	0.52206	-3.6141	0.00030139	0.00285939
tmem248	209.629	0.87469	0.242161	3.61202	0.000303816	0.0028799
zp3b	131.875	0.921345	0.255256	3.6095	0.000306792	0.00290558
thoc2	1865.13	-0.581923	0.161263	-3.60853	0.000307931	0.00291383
taf7	1822.26	0.563233	0.156139	3.60724	0.000309469	0.00292076
cyp1a	173.749	-4.25977	1.18083	-3.60745	0.000309215	0.00292076
abi2a	575.659	0.562898	0.156034	3.60753	0.00030913	0.00292076
h2afvb	6500.65	0.546701	0.151639	3.60527	0.000311826	0.00294046
sp8b	76.7683	-2.64525	0.734276	-3.60253	0.000315139	0.00296913
cep57	21.1642	-3.03221	0.841875	-3.60174	0.0003161	0.0029756
setd8b	881.355	0.608306	0.168995	3.59955	0.000318771	0.00299816
si:ch211-156j16.1	616.247	0.678689	0.188637	3.59786	0.000320843	0.00301504
tagapa	37.4678	2.28759	0.636159	3.59593	0.000323232	0.00303486
gtf2h2	541.474	0.681706	0.189686	3.59387	0.000325803	0.00305637
rsrp1	484.34	-1.13881	0.317076	-3.59161	0.000328642	0.00308035
shtn1	5.29651	-6.13883	1.70947	-3.59107	0.000329318	0.00308137
ndufs2	2456.95	0.486597	0.135502	3.59108	0.000329312	0.00308137
jph2	14.8463	-3.3221	0.925453	-3.58971	0.000331049	0.00309491
arglu1b	897.6	0.531716	0.148173	3.58848	0.000332612	0.00310686
papd4	457.001	0.550356	0.153419	3.58728	0.000334144	0.00311849
mob1ba	964.002	0.569145	0.158747	3.58522	0.000336795	0.00314053
ndufb7	588.625	0.631258	0.176112	3.5844	0.000337851	0.00314706
slc25a37	133.871	1.19887	0.334486	3.58423	0.000338074	0.00314706
hmga2	393.54	-1.36059	0.379635	-3.58393	0.000338458	0.00314795
ptprn2	18.6892	-3.86548	1.07889	-3.58283	0.000339891	0.00315858
tmem30ab	338.816	-0.814778	0.227561	-3.58049	0.000342953	0.00318223
atp5e	929.429	0.861056	0.240489	3.58044	0.000343021	0.00318223
rmdn3	26.0014	-2.10929	0.589552	-3.57778	0.00034652	0.00321195
dmap1	751.182	0.598773	0.167448	3.57588	0.000349051	0.00323266
cav2	26.1634	-3.04103	0.85055	-3.57537	0.000349739	0.00323627
cks1b	917.74	0.739792	0.206976	3.57428	0.000351194	0.00324422
crabp2b	92.2846	-1.59418	0.445998	-3.57442	0.000351002	0.00324422
mpp1	1231.23	-0.82219	0.230113	-3.57298	0.000352946	0.00325488
myf5	40.6014	-3.19178	0.893262	-3.57317	0.000352688	0.00325488
naa30	1015.7	0.607897	0.170188	3.57192	0.000354379	0.00326532
snd1	1536.07	-0.521418	0.145992	-3.57155	0.000354872	0.0032671
ttc14	358.719	0.743887	0.208381	3.56984	0.000357193	0.00328569
cdh7	23.6474	-2.84142	0.796223	-3.56862	0.000358867	0.00329552
dnase1l3	51.9913	-2.27041	0.636194	-3.56873	0.000358709	0.00329552
polr2d	807.068	0.58673	0.164516	3.5664	0.000361914	0.00331511
klf17	84.9689	-2.88252	0.808163	-3.56676	0.00036142	0.00331511
hoxc1a	25.6503	-2.20166	0.61732	-3.56648	0.000361803	0.00331511
zgc:73111	964.797	0.596448	0.167296	3.56522	0.000363558	0.00332178
eif3s6ip	4475.8	0.419655	0.117703	3.56536	0.000363357	0.00332178
cwc22	781.963	-0.475702	0.133422	-3.5654	0.000363306	0.00332178
zgc:194621	11.1551	-4.2675	1.19711	-3.56485	0.000364064	0.00332361
aldoab	43.9994	-3.37001	0.945408	-3.56461	0.000364399	0.00332388
slc35g2b	259.423	-1.058	0.296907	-3.56341	0.000366061	0.00333625
idh3b	673.251	0.567423	0.159284	3.56234	0.00036757	0.00334719
abi3bpb	22.7376	-2.86607	0.804714	-3.5616	0.000368607	0.00335212
zic4	8.07125	-6.74187	1.89298	-3.56151	0.000368727	0.00335212
stxbp2	63.4481	-1.2516	0.351535	-3.56039	0.000370308	0.00336368
ndufb2	479.169	0.653806	0.183896	3.55531	0.000377539	0.0034265
dlg1l	43.9816	-1.7752	0.499415	-3.55456	0.000378608	0.00343335
dhrs7	112.727	0.943087	0.265377	3.55377	0.000379753	0.00344086
tmem134	1155.94	0.500968	0.141027	3.55229	0.000381897	0.00345741
rab14	1563.18	0.493376	0.138958	3.55055	0.000384433	0.00347747
eif3d	5062.96	0.425493	0.119889	3.54906	0.000386606	0.00349422
b3galnt2	420.997	0.905602	0.255309	3.54709	0.000389517	0.00351762
kctd12.1	23.8994	-4.0678	1.14704	-3.54636	0.000390599	0.00352446
rrm1	1904.21	-0.626297	0.176641	-3.54558	0.000391746	0.00353188
tcf15	53.4214	-2.96641	0.836725	-3.54527	0.000392218	0.00353321
si:dkeyp-46h3.2	291.546	0.920532	0.259677	3.54491	0.000392753	0.0035351
rmdn1	66.2374	-1.32172	0.372908	-3.54437	0.000393552	0.00353937
zgc:174268	513.705	0.849984	0.240002	3.54158	0.000397743	0.00357411
acsf2	117.689	-1.07476	0.303555	-3.54059	0.000399233	0.00358157
tmed10	4983.64	0.451693	0.127569	3.54077	0.000398954	0.00358157
ndufa4l	1709.45	0.749311	0.211747	3.53872	0.000402078	0.00360413
emilin1b	21.351	-2.66972	0.75452	-3.5383	0.000402714	0.00360686
hoxb1b	543.739	-0.657782	0.186078	-3.53499	0.000407793	0.00364448
rnf7	574.31	0.609335	0.172365	3.53514	0.000407559	0.00364448
kpna2	5579.6	0.487527	0.137918	3.53491	0.000407919	0.00364448
cmtm7	158.98	-0.823415	0.232974	-3.53437	0.00040875	0.00364592
prpf38a	744.81	0.54549	0.154333	3.5345	0.000408551	0.00364592
si:ch211-185a18.2	89.7132	-1.02136	0.28965	-3.52617	0.000421614	0.00375758
zgc:174855	916.972	-7.05874	2.0021	-3.52567	0.000422416	0.00376164
fbxl22	21.9611	-3.64108	1.03341	-3.52336	0.000426111	0.00379144
smtnl	4415.92	-0.600641	0.170582	-3.52114	0.000429702	0.00382028
nkx3.2	135.175	1.0938	0.310664	3.52084	0.000430177	0.00382137
arpc1a	1656.84	0.507387	0.144155	3.51974	0.000431968	0.00383416
zgc:92480	58.2872	1.7838	0.507017	3.51823	0.000434439	0.00385294
mpp2b	5.89755	-6.30008	1.79084	-3.51794	0.000434903	0.00385392
aoc2	264.447	0.772259	0.219595	3.51674	0.00043688	0.00386829
g3bp2	702.214	-0.825512	0.235052	-3.51204	0.000444676	0.00393411
uxs1	335.373	-0.623109	0.177469	-3.51108	0.00044629	0.00394519
acad8	48.2331	-1.34962	0.384954	-3.50592	0.00045504	0.00401927
yif1b	134.854	0.990202	0.282458	3.50566	0.00045548	0.00401989
zgc:162544	143.553	-0.826603	0.235806	-3.50543	0.00045587	0.00402008
mettl8	52.6561	-1.41043	0.402501	-3.50415	0.00045806	0.00403612
sf3a3	3203.62	0.492214	0.140491	3.50353	0.000459137	0.00404234
ccdc94	1251.35	0.58972	0.168346	3.50302	0.000460019	0.00404683
agpat6	692.52	0.485167	0.138585	3.50087	0.000463738	0.00407296
mbd3a	3152.02	0.445357	0.127206	3.50108	0.000463375	0.00407296
sdhb	821.462	0.547646	0.156536	3.49852	0.000467845	0.00410572
cerkl	19.2619	-2.11758	0.605362	-3.49805	0.000468681	0.00410974
mat1a	8.21331	-4.24746	1.2147	-3.49672	0.000471012	0.00412685
s1pr2	97.5685	-1.33055	0.380672	-3.49527	0.000473575	0.00414597
prpf40a	2694.37	0.419861	0.120135	3.49489	0.000474249	0.00414853
acsbg2	786.563	-0.851001	0.243608	-3.49332	0.000477051	0.00416969
zgc:56106	710.601	0.53423	0.152954	3.49274	0.00047809	0.00417542
wdr91	82.9183	-1.0744	0.307664	-3.49212	0.000479207	0.00418182
tfip11	960.857	0.787371	0.22575	3.4878	0.000487017	0.00424657
mob3a	1187.97	0.469216	0.134626	3.48534	0.000491514	0.00428235
igfbp7	102.517	1.38202	0.396675	3.48401	0.000493953	0.00429806
u2af1	3453.32	0.518004	0.148684	3.48393	0.000494107	0.00429806
zgc:55943	709.796	0.524466	0.150618	3.48209	0.000497511	0.00432421
chic1	120.278	0.93126	0.267672	3.47911	0.000503081	0.00436565
mid1ip1b	40.4211	1.74477	0.501473	3.47928	0.000502762	0.00436565
gnpda1	39.6778	-1.77584	0.51073	-3.47707	0.000506924	0.004392
rbm5	487.572	0.684399	0.196832	3.47708	0.00050691	0.004392
tram2	1134.54	-0.449464	0.129307	-3.47594	0.000509059	0.00440698
snx15	25.4462	-2.07317	0.596512	-3.47548	0.000509932	0.00441103
rae1	1536.25	0.449029	0.1293	3.47276	0.000515141	0.00445255
rab7	785.017	0.716031	0.206222	3.47214	0.000516331	0.00445929
gcat	115.159	-1.01864	0.293428	-3.47152	0.000517516	0.00446598
tbc1d23	766.939	0.504139	0.145238	3.47112	0.000518302	0.00446922
irf2bp2a	1856.07	-1.21099	0.348944	-3.47046	0.000519577	0.00447667
spc24	879.42	0.577967	0.166567	3.46987	0.000520711	0.00448289
ccdc79	14.0462	-2.80166	0.808066	-3.46712	0.000526077	0.00452551
ap1b1	1319.22	0.443269	0.127886	3.46613	0.000528002	0.00453848
trpc4apa	1474.79	0.442573	0.127807	3.46283	0.000534525	0.00458722
tgfbr2	474.618	0.663644	0.191659	3.46262	0.000534937	0.00458722
pfn2	3282.58	0.429964	0.12416	3.46298	0.000534234	0.00458722
derl1	1035.31	-0.645032	0.186355	-3.46131	0.000537546	0.00460596
cnot10	355.309	0.638187	0.184408	3.46074	0.000538703	0.00461224
tsn	1875.23	0.503961	0.145649	3.4601	0.000539971	0.00461947
gtf2a1	1530.3	0.616701	0.178376	3.45731	0.000545605	0.00466034
eda	62.2479	1.5626	0.451949	3.45747	0.000545277	0.00466034
zgc:101851	108.004	-1.0888	0.31495	-3.45706	0.000546109	0.00466099
sfswap	753.641	-0.657308	0.190172	-3.45639	0.000547468	0.00466893
msl2b	733.432	0.719175	0.208183	3.45453	0.000551258	0.00469389
pcdh8	51.3383	-3.04684	0.88194	-3.4547	0.000550903	0.00469389
zgc:66447	495.331	0.707031	0.204782	3.4526	0.000555216	0.00472389
sf3b4	5259.77	0.459084	0.133068	3.44999	0.000560609	0.00476606
sim1a	7.75518	-4.19326	1.21561	-3.44952	0.000561575	0.00477053
nr2e1	18.1555	-4.43785	1.28801	-3.4455	0.000569996	0.0048383
ect2	307.766	-0.678005	0.196797	-3.4452	0.000570645	0.00484003
exo5	114.098	-0.988955	0.287237	-3.44299	0.000575322	0.00487211
scn4bb	51.5528	1.5688	0.455649	3.44299	0.000575311	0.00487211
tmem110	341.222	0.763356	0.221788	3.44183	0.000577799	0.00488548
pus1	364.296	-0.650719	0.189051	-3.44202	0.00057738	0.00488548
ptmaa	2628.92	-0.37471	0.108969	-3.43869	0.000584528	0.00493853
atp5f1	2538.01	0.498363	0.144941	3.43838	0.00058521	0.00494046
ptger4a	12.0345	-3.1156	0.906535	-3.43683	0.000588575	0.00496502
dnmt3bb.1	79.5305	-1.34371	0.391068	-3.436	0.000590375	0.00497635
cdh11	3630.56	-0.622895	0.181371	-3.43436	0.000593948	0.00500259
ramp2	196.885	-0.705492	0.205456	-3.43378	0.000595225	0.00500947
zgc:113076	821.733	0.566647	0.165033	3.43353	0.000595785	0.0050103
psmc4	5967.93	0.491646	0.1432	3.43328	0.000596335	0.00501106
npr3	44.7744	-3.33692	0.972085	-3.43275	0.000597492	0.0050169
cstf2	2096.69	0.469277	0.136774	3.43105	0.000601255	0.00504461
ulk3	18.2322	-2.38579	0.695401	-3.43081	0.000601788	0.00504519
ak3	534.426	-0.589788	0.171926	-3.43049	0.000602503	0.00504584
rx2	9.76005	-6.04014	1.76079	-3.43035	0.000602793	0.00504584
tgfbi	405.44	-1.1868	0.34615	-3.42857	0.000606775	0.00507527
nutf2	2155.51	0.448517	0.130901	3.42638	0.000611678	0.00510843
taf11	448.837	0.694249	0.202616	3.42643	0.00061158	0.00510843
cmn	92.4905	-10.2827	3.00424	-3.42273	0.000619961	0.00517363
zc3h13	1846.35	0.53437	0.156192	3.42124	0.000623373	0.00519812
slc9a6a	190.408	-0.765591	0.223933	-3.41884	0.000628896	0.00524016
icmt	127.219	-0.818748	0.239541	-3.41799	0.000630862	0.00525252
txlnbb	9.79316	-6.05027	1.77069	-3.4169	0.000633385	0.00526949
ogg1	105.634	-0.94511	0.276661	-3.41614	0.000635162	0.00528024
otud5b	744.301	0.504048	0.147602	3.41491	0.000638021	0.00529996
sapcd2	103.733	1.05135	0.307936	3.41419	0.00063971	0.00530994
ppp1r14c	65.615	-1.73884	0.509369	-3.41371	0.000640845	0.0053153
ahsa1a	337.747	-0.884482	0.259236	-3.41188	0.000645156	0.00534698
si:dkey-23c22.2	253.442	0.734132	0.215266	3.41034	0.000648814	0.00537321
msh2	867.118	-0.593286	0.17402	-3.4093	0.000651297	0.00538615
spice1	75.9054	1.5579	0.456959	3.40927	0.000651367	0.00538615
tfdp1b	1080.65	0.471741	0.138383	3.40895	0.000652145	0.00538849
hopx	130.927	-1.86847	0.548149	-3.40869	0.000652763	0.00538951
snrpd2	3848.65	0.490805	0.143998	3.40842	0.000653394	0.00539062
tead1a	93.9776	0.957228	0.280978	3.40678	0.000657347	0.00541913
dph1	122.005	-0.837355	0.245833	-3.4062	0.000658743	0.00542653
dpf2l	1528.08	0.565797	0.16616	3.40512	0.000661345	0.00544384
aldh1a3	6.97777	-6.544	1.92228	-3.40429	0.000663372	0.0054564
wu:fb37b09	374.564	-7.74146	2.27469	-3.4033	0.000665763	0.00547193
tmem203	288.121	0.62486	0.183653	3.40241	0.000667955	0.0054858
arsg	11.267	-3.42686	1.0073	-3.40203	0.000668864	0.00548913
chrna4b	13.5818	-2.89441	0.850851	-3.40179	0.00066947	0.00548995
eng1b	9.86597	-6.06122	1.78209	-3.40119	0.000670943	0.00549376
acss2	256.138	-0.898531	0.264177	-3.40124	0.000670803	0.00549376
ddx21	1266.18	-0.481663	0.141659	-3.40017	0.000673449	0.00551013
ggact.2	351.413	0.596692	0.175574	3.39852	0.000677516	0.00553924
p2rx3a	7.12049	-6.57506	1.93504	-3.39789	0.000679072	0.00554364
crb2a	615.749	-1.07706	0.316976	-3.39793	0.00067899	0.00554364
rmnd1	12.473	-2.73669	0.806048	-3.3952	0.000685785	0.00559423
zgc:86896	5.85828	-5.30796	1.5638	-3.39427	0.00068811	0.005609
slu7	666.8	0.536074	0.158048	3.39186	0.00069421	0.00565025
mdm1	17.0709	-2.15926	0.636587	-3.39193	0.000694025	0.00565025
nsa2	4788.74	0.477949	0.140948	3.39096	0.000696483	0.00566452
hsbp1b	633.121	0.571095	0.168463	3.39004	0.000698832	0.00567938
sptlc2a	461.529	0.649541	0.191725	3.38789	0.000704334	0.00571982
foxc1a	209.082	-1.10694	0.326827	-3.38694	0.000706775	0.00573537
dnmt1	629.537	-0.578627	0.170883	-3.38609	0.000708955	0.00574877
raf1a	131.466	-0.877537	0.259185	-3.38575	0.000709831	0.00575159
vps11	134.988	-0.997158	0.294694	-3.38371	0.000715144	0.00579033
klhl7	22.3169	-2.62709	0.776545	-3.38306	0.000716839	0.00579973
slit1a	100.403	-1.38238	0.409134	-3.3788	0.000728027	0.00588517
xirp1	40.5649	-2.80087	0.828997	-3.37863	0.00072848	0.00588517
zgc:56095	1567.2	0.501941	0.148584	3.37816	0.000729725	0.00589085
psmb6	2084.65	0.563577	0.166878	3.37717	0.000732358	0.00590772
fancb	63.6458	-1.25695	0.372308	-3.3761	0.000735214	0.00592637
gatm	758.102	1.16408	0.344837	3.37574	0.000736187	0.00592982
med7	616.1	0.608557	0.18032	3.37487	0.000738497	0.00594403
becn1	82.7145	-1.30616	0.387354	-3.37202	0.000746196	0.00600156
esf1	1021.52	0.537135	0.159328	3.37126	0.000748258	0.00600483
fblim1	166.787	0.895464	0.265606	3.3714	0.000747872	0.00600483
zgc:136308	480.724	0.574422	0.170378	3.37147	0.000747695	0.00600483
chrnd	12.4919	-6.40939	1.90232	-3.36925	0.000753723	0.00604122
mks1	47.3204	-1.4012	0.415885	-3.36919	0.000753903	0.00604122
arl4d	862.16	0.83173	0.247035	3.36685	0.000760327	0.00608821
zgc:158328	24.2908	-3.10863	0.923509	-3.3661	0.000762381	0.00610017
zgc:103499	59.9249	-1.21768	0.361865	-3.36503	0.000765363	0.00611953
bmp7a	233.968	1.08589	0.323006	3.36183	0.000774283	0.00618631
napga	20.96	-2.6826	0.798263	-3.36054	0.000777899	0.00621064
mmp14b	272.027	-0.748442	0.222791	-3.35939	0.000781138	0.00623192
rfc1	303.097	-0.726032	0.216297	-3.35663	0.000788973	0.00627857
pnx	17.8698	-2.62493	0.782119	-3.35618	0.000790263	0.00627857
bcl7ba	279.684	-0.795502	0.236993	-3.35664	0.000788954	0.00627857
lrp12	380.914	0.626613	0.186708	3.35612	0.000790446	0.00627857
lima1a	1511.57	0.814379	0.24265	3.35619	0.000790253	0.00627857
gnaia	2988.89	0.403017	0.120068	3.35658	0.000789134	0.00627857
chchd2	998.718	0.574408	0.171185	3.35549	0.000792247	0.00628828
polr2c	1180.18	0.570143	0.169942	3.35492	0.000793886	0.00629669
psmd8	4159.84	0.437637	0.130593	3.35116	0.000804729	0.00637805
oxct1a	249.127	-0.634418	0.189468	-3.34842	0.000812735	0.00643682
rbpja	322.2	1.08986	0.325675	3.34648	0.00081845	0.00647736
spaw	41.3553	-2.59128	0.774395	-3.3462	0.000819285	0.00647926
polr2b	4021.49	0.54558	0.163102	3.34502	0.000822777	0.00650215
rhogd	238.858	0.697445	0.208583	3.34373	0.00082659	0.00651336
grasp	57.2296	-1.81716	0.543366	-3.34427	0.000824988	0.00651336
eya1	231.852	-1.36969	0.409615	-3.34385	0.000826248	0.00651336
cav1	35.853	-2.3932	0.715644	-3.34413	0.000825425	0.00651336
copg2	2899.74	0.43603	0.130414	3.34342	0.000827527	0.00651603
esrra	131.733	1.32514	0.396476	3.34229	0.000830915	0.00653797
wdr33	1391.94	-0.792913	0.23726	-3.34195	0.000831912	0.00654109
si:ch211-262h13.3	378.788	-0.875526	0.26204	-3.3412	0.000834184	0.00655422
cox6b2	3077.03	0.560257	0.167733	3.34017	0.000837269	0.00657371
znf503	965.931	-0.537687	0.161017	-3.33932	0.000839831	0.00658907
pdxdc1	159.643	-0.866397	0.259481	-3.33896	0.000840922	0.00659288
plk2b	31.2932	-4.39382	1.31607	-3.33859	0.000842034	0.00659684
gnb2l1	5212.13	-0.513826	0.153943	-3.33777	0.000844523	0.00661158
abcc4	105.588	-1.22171	0.366097	-3.33711	0.000846558	0.00662275
mapkapk2a	2586.4	0.361169	0.108262	3.33606	0.000849748	0.00664293
ube2l3b	1373.15	0.444005	0.133192	3.33358	0.000857359	0.00669761
lppr3a	131.643	-0.879075	0.263736	-3.33316	0.000858669	0.00670304
farsa	1328.23	0.653767	0.196278	3.33082	0.00086592	0.0067548
fahd2a	30.097	-2.17879	0.654185	-3.33054	0.000866765	0.00675655
eef2b	10346.2	-0.439769	0.132075	-3.32969	0.000869419	0.00676663
zgc:110796	209.873	1.03293	0.310213	3.32974	0.000869271	0.00676663
si:dkey-261j4.5	344.097	1.38555	0.416138	3.32953	0.000869924	0.00676663
sp5a	308.855	0.756062	0.227263	3.32682	0.000878446	0.00682804
tab3	682.014	0.477359	0.143521	3.32606	0.000880825	0.00684164
pigv	76.7316	1.41882	0.426622	3.32571	0.000881947	0.00684547
hdac9b	14.1937	-4.66181	1.40207	-3.32496	0.000884304	0.00685399
mbd3b	2305.8	0.509847	0.153336	3.32504	0.000884052	0.00685399
sulf2a	14.1296	-4.60619	1.38546	-3.32465	0.00088529	0.00685674
zgc:162613	26.7189	-2.19496	0.660913	-3.3211	0.000896635	0.00693967
ddah2	1133.49	0.449168	0.135341	3.31879	0.000904091	0.00698744
psmb4	3776.16	0.728954	0.219641	3.31884	0.000903927	0.00698744
oaz1b	8175.11	0.433736	0.130773	3.31671	0.000910826	0.00702951
prkcbp1l	800.684	-0.687397	0.207252	-3.31672	0.000910821	0.00702951
calm2b	5859.84	0.641753	0.193531	3.31601	0.000913115	0.00703353
mapk8a	251.335	0.850391	0.256431	3.31625	0.00091233	0.00703353
atp6v0b	714.878	0.593193	0.178901	3.31576	0.000913933	0.00703353
zgc:103759	14.7384	-2.64531	0.797778	-3.31585	0.000913661	0.00703353
exoc3l1	30.4687	-1.98435	0.598591	-3.31504	0.000916316	0.00704689
runx1	9.95848	-3.2671	0.986277	-3.31256	0.000924457	0.00710009
onecutl	12.0193	-6.34549	1.9156	-3.31254	0.000924538	0.00710009
atp6v0a1a	448.053	0.636277	0.192189	3.31068	0.000930698	0.00714235
baxa	895.717	0.540381	0.16326	3.30993	0.000933182	0.00715637
zgc:153215	433.258	0.777657	0.235039	3.30863	0.000937532	0.00718467
znf330	1381.26	0.494804	0.149597	3.30757	0.000941077	0.00720675
tbx6	29.7944	-4.02279	1.21669	-3.30633	0.000945266	0.00723375
otulina	166.06	0.750931	0.227217	3.3049	0.00095009	0.00726555
catip	6.49254	-5.43379	1.64427	-3.30469	0.000950821	0.00726603
rbx1	1671.4	0.510067	0.154388	3.3038	0.000953853	0.00728409
gabpb2b	133.286	0.799923	0.24219	3.30288	0.000956978	0.00730283
mapk15	13.6864	-3.06742	0.92891	-3.30217	0.000959382	0.00731605
pbxip1b	40.5356	-3.18464	0.964468	-3.30197	0.000960084	0.00731627
thsd7aa	4.85189	-6.00011	1.81745	-3.30139	0.000962074	0.00732415
mdka	945.614	-2.09206	0.633714	-3.30128	0.000962464	0.00732415
tcta	347.636	0.745252	0.225767	3.30098	0.000963468	0.00732666
col9a1b	32.0677	-8.75341	2.65268	-3.29984	0.000967393	0.00733414
mre11a	173.605	-0.867208	0.262813	-3.29972	0.000967821	0.00733414
meaf6	1891.61	0.417179	0.126423	3.29986	0.000967317	0.00733414
smim15	575.404	0.525301	0.159159	3.30048	0.000965198	0.00733414
csnk1g2b	1558.23	0.45015	0.136411	3.29995	0.000967016	0.00733414
cdk9	1905.97	0.398198	0.120684	3.29951	0.00096854	0.00733448
gli2a	573.455	-0.944704	0.286649	-3.29568	0.000981851	0.00743011
brd3a	2956.52	0.43071	0.130729	3.29468	0.000985331	0.00744609
slc48a1b	253.979	0.646946	0.196349	3.29488	0.000984654	0.00744609
gatsl2	269.835	-0.764344	0.232014	-3.29438	0.000986377	0.00744883
msxb	859.724	0.793115	0.241052	3.29023	0.00100106	0.00755363
egln1b	317.262	-0.572687	0.174096	-3.28948	0.00100373	0.00755363
cops7a	754.666	0.512408	0.155749	3.28995	0.00100205	0.00755363
crlf1a	251.792	-0.850778	0.258615	-3.28975	0.00100278	0.00755363
ywhaqa	1545.31	0.532414	0.161844	3.28967	0.00100305	0.00755363
kpna3	2772.79	0.461593	0.140436	3.28686	0.00101312	0.00761905
ndufb10	1166.99	0.603512	0.183801	3.28351	0.00102522	0.00770474
her4.2	88.7991	-4.72366	1.43881	-3.28304	0.00102695	0.00771242
ppp1r14bb	3008.27	-0.339213	0.103354	-3.28205	0.00103054	0.00773403
znf1124	600.04	0.613972	0.187104	3.28145	0.00103274	0.00774519
vmhcl	104.272	1.53276	0.467149	3.2811	0.00103402	0.00774947
hbae1	654.971	0.840387	0.256163	3.28067	0.00103561	0.00775599
psmb7	5988.63	0.383873	0.11706	3.27928	0.00104073	0.007789
sft2d3	97.7182	0.919649	0.28054	3.27814	0.00104494	0.00781516
arfgap2	873.413	0.497679	0.151835	3.27776	0.00104636	0.00782039
haus1	211.697	0.869259	0.265218	3.27752	0.00104722	0.00782144
mfsd8	145.172	-0.788058	0.240485	-3.27696	0.00104933	0.0078318
psen1	1667.86	0.573251	0.174952	3.27663	0.00105054	0.0078355
fbxw2	675.056	0.478332	0.146002	3.27621	0.0010521	0.00784175
her7	31.8975	-3.56155	1.08853	-3.2719	0.00106828	0.0079569
zc2hc1a	385.673	0.62276	0.190396	3.27087	0.00107218	0.00798049
smarcd3b	582.026	0.639208	0.195462	3.27024	0.00107457	0.00799278
sox21a	46.9672	-3.04238	0.930446	-3.2698	0.00107622	0.00799959
lamtor2	138.7	-0.896915	0.274469	-3.26782	0.00108381	0.00805051
kdelr2a	2692.45	0.797608	0.244115	3.26735	0.00108561	0.00805842
lnx1	47.5212	-1.49863	0.458732	-3.2669	0.0010873	0.00806271
mrpl20	412.604	0.663248	0.203026	3.26681	0.00108767	0.00806271
dand5	53.7967	-3.35501	1.02736	-3.26568	0.00109201	0.00808938
rassf2b	4.50637	-5.91989	1.81335	-3.26462	0.00109613	0.00811431
klc1b	373.519	0.682312	0.209024	3.26428	0.00109743	0.00811846
lipf	94.1313	-1.1675	0.357783	-3.26316	0.00110176	0.00814496
ier5l	795.169	-1.13414	0.347824	-3.26069	0.00111143	0.00821084
mtmr7b	47.5614	-1.2148	0.372683	-3.25961	0.00111564	0.00823078
banf1	4867.64	0.407494	0.125011	3.25966	0.00111548	0.00823078
slc25a44a	161.107	1.24837	0.383165	3.25804	0.00112183	0.00827081
serinc1	1508.4	0.393113	0.120675	3.25762	0.00112351	0.0082776
hsp90aa1.1	416.228	-4.9376	1.5167	-3.25548	0.00113201	0.00833459
pa2g4a	4530.95	0.366679	0.112655	3.25489	0.00113434	0.00834614
timm8a	264.421	-0.661577	0.203284	-3.25445	0.00113613	0.00835366
ndufa11	330.894	0.749267	0.230276	3.25377	0.00113883	0.00836781
ahsa1b	1243.85	0.546358	0.16796	3.2529	0.00114232	0.00838244
zgc:158296	5.57015	-6.21905	1.91185	-3.25289	0.00114236	0.00838244
zdhhc13	711.375	0.48629	0.149505	3.25268	0.00114322	0.00838309
cdc20	2114.75	0.399262	0.122866	3.24957	0.00115582	0.00846976
pias4a	2196.05	0.407498	0.125433	3.24874	0.00115918	0.00848872
acsm3	97.0721	-1.15085	0.354288	-3.24833	0.00116084	0.00848941
arpc2	3708.47	0.400267	0.12322	3.24839	0.00116059	0.00848941
tmem230a	152.054	0.794708	0.244759	3.2469	0.00116668	0.00852638
pnpo	22.8206	-2.01181	0.61966	-3.24663	0.00116781	0.00852895
si:ch211-239e6.4	329.946	0.579109	0.178536	3.24365	0.00118009	0.00861287
rorb	10.8466	-3.96397	1.2225	-3.24251	0.00118482	0.00864153
kat5b	948.943	0.476754	0.147183	3.23919	0.00119868	0.00873677
zgc:174928	129.976	-0.962961	0.297318	-3.23883	0.00120021	0.00874209
atp1b3b	65.9717	-1.45925	0.450616	-3.23834	0.00120229	0.00875138
arl2	140.164	1.20798	0.373178	3.23702	0.00120784	0.00878589
smyhc3	11.0902	-6.22693	1.92449	-3.23562	0.00121378	0.00882321
nr2f1a	950.697	-0.45247	0.139903	-3.23418	0.00121993	0.00886204
chl1a	8.13621	-4.85108	1.50009	-3.23386	0.0012213	0.00886606
nrarpa	202.836	-3.16708	0.980705	-3.22939	0.00124055	0.00899975
mtif2	135.47	-1.04887	0.324807	-3.2292	0.00124137	0.00899975
ndufv2	580.805	0.56741	0.175742	3.22866	0.00124372	0.00901073
cfap36	312.514	0.564051	0.174783	3.22714	0.00125033	0.00904659
rnf121	205.405	-1.00446	0.311243	-3.22727	0.00124979	0.00904659
LOC100149863	164.203	-3.7087	1.14963	-3.226	0.00125532	0.00907666
sort1a	538.648	-0.637445	0.197667	-3.22484	0.00126044	0.0091037
slc4a11	26.765	-2.85146	0.884289	-3.22458	0.00126157	0.0091037
col5a2a	137.139	-1.18216	0.366599	-3.22466	0.00126122	0.0091037
st3gal5	1314.59	0.393272	0.121982	3.22402	0.00126406	0.00911561
rcc1	1153.59	-0.392501	0.121763	-3.22349	0.00126638	0.00912151
eif2s3	3685.3	0.42816	0.132827	3.22345	0.00126655	0.00912151
ripk4	8.86263	-4.34262	1.34821	-3.22104	0.00127726	0.0091804
spry1	398.196	-0.947847	0.294238	-3.22137	0.00127581	0.0091804
mgat2	403.14	0.659176	0.204639	3.22116	0.00127673	0.0091804
fam192a	371.048	0.550929	0.171053	3.22081	0.00127828	0.0091817
ptpn2a	226.843	0.688293	0.213744	3.22017	0.00128114	0.00919007
fam3a	1184.09	0.456002	0.1416	3.22035	0.00128032	0.00919007
hoxa9b	603.78	-0.783723	0.243414	-3.21971	0.00128321	0.00919889
ruvbl2	879.206	0.652066	0.202536	3.2195	0.00128414	0.00919946
denr	2642.81	0.363305	0.112876	3.21863	0.00128805	0.00921596
tcf7l1b	481.17	-0.556541	0.172914	-3.21861	0.00128813	0.00921596
abhd17c	1303.25	0.417456	0.129716	3.21824	0.00128981	0.00922186
cbfb	143.343	-1.13449	0.352625	-3.21728	0.00129413	0.0092324
unc119b	74.8263	-1.12723	0.35038	-3.21716	0.00129467	0.0092324
si:ch211-226m16.2	115.91	-1.7559	0.54578	-3.21723	0.00129436	0.0092324
mcm4	3372.99	-0.501731	0.155949	-3.21728	0.00129412	0.0092324
pygb	79.5461	-1.23708	0.38456	-3.21687	0.00129599	0.00923575
rpl12	1176.99	-0.726581	0.225919	-3.21611	0.00129939	0.00925389
ptgs1	21.5047	-2.98506	0.928608	-3.21455	0.00130649	0.0092984
psmd14	1911.77	0.477605	0.148653	3.21289	0.00131409	0.00934024
rbm24a	592.383	-1.08784	0.338569	-3.21304	0.00131338	0.00934024
neil3	221.523	0.753816	0.234659	3.21239	0.00131635	0.00935023
adck3	593.088	-0.48674	0.151541	-3.21194	0.00131841	0.00935876
orai1b	241.072	0.733364	0.228352	3.21155	0.00132022	0.00936544
gpr107	972.002	0.406402	0.126635	3.20922	0.00133094	0.00943536
egr2b	66.1634	-4.51557	1.40727	-3.20874	0.00133318	0.00943894
slc1a3a	130.234	-1.48445	0.462626	-3.20875	0.00133311	0.00943894
prepl	17.1863	-2.01632	0.628461	-3.20835	0.001335	0.00944566
rad21a	7995.4	0.38956	0.121496	3.20635	0.00134428	0.00950519
actc1b	512.384	-5.11637	1.59617	-3.2054	0.00134873	0.00953045
ndufab1b	1503.52	0.549996	0.171636	3.20442	0.00135333	0.00955671
sarnp	1373.14	0.403746	0.126007	3.20415	0.00135461	0.00955955
lmx1bb	12.5759	-4.13723	1.29142	-3.20363	0.00135708	0.00957079
hephl1a	101.704	-0.937026	0.292519	-3.2033	0.00135861	0.00957541
lztfl1	401.468	-0.707217	0.220841	-3.20239	0.00136294	0.00959967
nkrf	1080.35	0.618445	0.193375	3.19816	0.00138305	0.00973505
tfpt	193.794	0.66706	0.208712	3.19608	0.0013931	0.00979644
cfap20	456.902	0.476774	0.149179	3.19598	0.00139358	0.00979644
slc25a5	27070.4	0.374252	0.117202	3.19322	0.00140697	0.00988419
eif4a3	4563.64	0.358645	0.112332	3.19271	0.00140945	0.00988968
calua	1449.6	-0.628384	0.19682	-3.19269	0.00140957	0.00988968
mef2aa	28.1842	-2.06438	0.646991	-3.19074	0.00141911	0.00995025
ist1	845.632	0.543278	0.170287	3.19036	0.00142094	0.00995663
aasdhppt	44.0505	-1.46149	0.458426	-3.18807	0.00143227	0.0100278
mettl25	82.9544	-1.00254	0.314481	-3.18793	0.00143294	0.0100278
casp2	44.1044	-1.50452	0.472125	-3.18671	0.00143903	0.010064
stx5al	298.704	0.738529	0.231798	3.1861	0.00144207	0.0100787
atp6v1g1	382.313	0.750525	0.235588	3.18575	0.0014438	0.0100843
sae1	2234.71	0.481871	0.151298	3.18491	0.00144799	0.0101071
pho	351.98	-0.753118	0.23654	-3.18389	0.00145312	0.0101364
tpcn2	31.7641	-1.80896	0.568227	-3.18351	0.00145502	0.0101432
dnajc10	694.865	0.508896	0.159966	3.18129	0.00146622	0.0102147
ttc1	854.135	0.654992	0.206114	3.17781	0.0014839	0.0103313
ccdc85ca	375.3	-0.744148	0.234516	-3.17312	0.00150809	0.0104863
sirt4	26.244	-1.60764	0.506623	-3.17326	0.00150739	0.0104863
mrps28	275.451	0.69538	0.21924	3.17178	0.00151509	0.0105282
ppp1r3b	1528.77	0.729253	0.22994	3.1715	0.00151656	0.0105318
psma4	3403.41	0.493458	0.155608	3.17116	0.00151834	0.0105373
rmnd5b	520.32	0.535126	0.168799	3.1702	0.00152335	0.0105654
lbx1b	9.47696	-5.07291	1.60037	-3.16983	0.00152527	0.010572
wnt4b	20.0257	1.96278	0.619344	3.16913	0.00152894	0.0105907
edem1	435.207	-0.58825	0.185681	-3.16807	0.00153456	0.0106228
rad51	814.758	0.515282	0.162746	3.16618	0.00154455	0.0106852
sema5a	6.87337	-3.97483	1.25558	-3.16573	0.00154696	0.0106951
crcp	315.027	0.6895	0.217876	3.16464	0.00155272	0.0107281
scamp2	895.066	0.510314	0.16127	3.16435	0.00155432	0.0107323
ctslb	359.43	-6.87955	2.17448	-3.16377	0.00155741	0.01074
rnd1l	351.179	-0.867869	0.274309	-3.16383	0.00155706	0.01074
selj	77.9352	-1.16846	0.369368	-3.1634	0.0015594	0.010747
plrg1	1537	0.375551	0.118737	3.16287	0.00156219	0.0107594
sap30bp	1657.61	0.429713	0.135887	3.16227	0.00156542	0.0107748
ddx55	271.953	-0.618261	0.195549	-3.16167	0.00156869	0.0107904
ctsf	413.411	-0.66659	0.211005	-3.15912	0.00158248	0.0108784
foxd1	22.443	-3.17403	1.00496	-3.15837	0.00158655	0.0108995
spcs1	1098.2	0.433567	0.137297	3.15787	0.00158924	0.0109111
dhrsx	24.2228	-2.00235	0.634366	-3.15646	0.00159698	0.0109573
six1b	18.6883	-3.18281	1.00852	-3.15591	0.00159997	0.0109709
zgc:194125	350.847	0.776443	0.246099	3.15501	0.00160494	0.0109981
vps9d1	119.928	-0.875336	0.277511	-3.15423	0.0016092	0.0110046
top2b	1305.02	-0.527981	0.167393	-3.15415	0.00160966	0.0110046
zgc:174263	460.177	0.671681	0.212954	3.15411	0.0016099	0.0110046
arhgap12a	160.857	0.806433	0.255678	3.15409	0.00160998	0.0110046
trim35-39	264.978	0.83958	0.266202	3.15392	0.00161095	0.0110046
ppt1	424.173	-0.551949	0.175028	-3.15348	0.00161336	0.0110142
dpcd	502.999	0.560883	0.177912	3.15258	0.00161833	0.0110412
dhrs7ca	4.83103	-6.00504	1.90533	-3.1517	0.00162322	0.0110676
dock1	390.074	-0.78608	0.249453	-3.15121	0.00162594	0.0110792
mapk12b	96.0812	-0.993632	0.31544	-3.14999	0.00163277	0.0111188
ctnnd2b	24.3298	-3.89263	1.23604	-3.14928	0.00163675	0.0111319
slc25a42	109.786	-0.815144	0.258833	-3.14931	0.00163656	0.0111319
tmem176	56.0055	-1.26511	0.401976	-3.14722	0.00164833	0.0112037
pglyrp2	5.2592	-6.13812	1.95048	-3.14698	0.00164967	0.0112058
daw1	6.75328	-5.48969	1.74474	-3.14642	0.00165283	0.0112202
kdm1a	4252.08	0.361157	0.114826	3.14526	0.00165941	0.0112579
pdia4	135.663	-0.987154	0.314186	-3.14194	0.00167833	0.0113792
rnf185	342.167	0.598888	0.190652	3.14127	0.00168219	0.0113982
ndfip2	388.41	0.687322	0.218825	3.14097	0.0016839	0.0114027
acadvl	743.732	-0.516958	0.164704	-3.13871	0.00169695	0.011484
taldo1	2741.73	0.361792	0.115392	3.13534	0.00171655	0.0116074
hnrnpc	2249.74	0.434311	0.138527	3.13521	0.00171733	0.0116074
uap1	180.062	-0.810321	0.25858	-3.13373	0.001726	0.0116588
si:dkey-238c7.16	17.7151	-2.51907	0.804228	-3.13229	0.0017345	0.0117089
uqcrh	1452.56	0.456494	0.145754	3.13196	0.00173644	0.0117148
rilpl2	339.724	0.580315	0.18535	3.13092	0.00174261	0.0117491
tlcd2	65.3573	-1.07691	0.344046	-3.13012	0.00174735	0.0117665
zgc:161969	1173.37	0.4095	0.130824	3.13015	0.00174715	0.0117665
garem	523.658	0.637717	0.203801	3.12911	0.00175338	0.0117998
taf9	927.605	0.536826	0.171578	3.12875	0.0017555	0.0118067
znf1005	352.453	0.788487	0.252039	3.12843	0.00175743	0.0118125
csad	80.6443	-1.02519	0.327771	-3.12777	0.00176139	0.0118318
eng2b	47.9986	-5.40851	1.72961	-3.12701	0.00176593	0.0118549
spata6l	59.5578	1.27614	0.408375	3.12493	0.0017785	0.0119319
ska2	616.258	0.697937	0.223555	3.122	0.0017963	0.0120365
ddx3b	1297.05	-0.821839	0.263236	-3.12206	0.00179592	0.0120365
hspa4b	2402.62	0.383059	0.122716	3.1215	0.00179932	0.0120494
zgc:153631	130.001	0.739348	0.2369	3.12093	0.0018028	0.0120652
cenpk	500.518	0.582796	0.186771	3.12038	0.00180618	0.0120804
rbms3	23.9763	-2.80294	0.898329	-3.12017	0.00180749	0.0120818
sox9a	34.6952	-1.82355	0.585056	-3.11689	0.0018277	0.0122018
rras2	323.477	-0.615728	0.197545	-3.11691	0.0018276	0.0122018
tnni2b.1	64.6148	-2.65039	0.850558	-3.11606	0.00183288	0.0122289
ube2e2	1648.46	0.395043	0.126789	3.11575	0.00183476	0.012234
myl10	305.303	-5.60561	1.79957	-3.11498	0.00183957	0.0122585
gclc	375.619	-0.612478	0.196639	-3.11474	0.00184109	0.0122612
ncam1a	11.2713	-3.99002	1.2811	-3.11452	0.00184244	0.0122627
cenpl	167.411	0.781693	0.251044	3.11377	0.00184712	0.0122863
tspan13b	12.0673	-4.39486	1.41291	-3.11051	0.00186764	0.0124152
cdk6	39.1555	1.60595	0.51663	3.10851	0.00188031	0.0124918
ret	6.94701	-5.52485	1.77839	-3.10665	0.0018922	0.0125631
klhl24b	19.1675	-2.21514	0.713747	-3.10353	0.00191226	0.0126847
rnpc3	340.769	0.509403	0.164141	3.10344	0.00191284	0.0126847
otpb	7.5743	-4.73684	1.52696	-3.10214	0.00192128	0.0127328
acaa2	564.588	0.690556	0.222679	3.10112	0.00192789	0.0127689
abhd16a	623.979	0.424303	0.136867	3.1001	0.00193455	0.0128018
dusp4	212.309	-1.45854	0.470496	-3.1	0.00193521	0.0128018
ugt1b1	17.3444	-2.58337	0.833468	-3.09955	0.00193815	0.0128135
optc	21.4286	-3.0227	0.975305	-3.09923	0.00194024	0.012816
sepsecs	61.7339	-1.00508	0.324311	-3.09913	0.00194089	0.012816
prcc	234.518	0.91659	0.295842	3.09825	0.0019467	0.0128466
nudt18	18.4032	-2.41407	0.779809	-3.09572	0.00196336	0.0129486
cldna	17.6715	-3.31528	1.07104	-3.09539	0.00196555	0.0129552
gtf2b	374.297	-0.524716	0.169612	-3.09363	0.00197725	0.0130245
sptlc3	90.5883	-0.924416	0.298916	-3.09256	0.00198436	0.0130634
cry-dash	118.716	-0.991612	0.320687	-3.09214	0.00198716	0.013074
fabp3	399.627	-2.33737	0.755954	-3.09195	0.00198846	0.0130746
dnal4a	219.879	0.68452	0.221455	3.09101	0.00199474	0.013108
jmjd7	15.9814	-2.0438	0.661262	-3.09076	0.00199646	0.0131113
dusp11	194.999	0.810397	0.262235	3.09035	0.0019992	0.0131214
dbnlb	130.376	0.853671	0.276287	3.0898	0.00200289	0.0131344
zc3h15	1382.91	0.349876	0.113239	3.0897	0.0020036	0.0131344
st3gal2l	370.101	0.755684	0.24474	3.0877	0.00201714	0.0132153
si:dkey-165n16.1	14.678	-2.34151	0.758671	-3.08633	0.00202643	0.0132601
cldn12	1413.63	0.405677	0.131437	3.08648	0.00202544	0.0132601
cxxc1a	356.523	0.649365	0.210437	3.0858	0.00203008	0.0132761
mospd1	174.797	0.681245	0.220862	3.08449	0.00203904	0.0133266
nudt4a	237.402	-0.615572	0.199587	-3.08423	0.00204083	0.0133303
btbd10a	295.997	1.14539	0.371528	3.0829	0.00204993	0.0133817
rnf34a	115.556	0.958921	0.31112	3.08215	0.00205508	0.0134073
mettl1	362.26	-0.580974	0.188527	-3.08165	0.00205858	0.0134113
myog	12.8786	-4.49202	1.45771	-3.08157	0.00205911	0.0134113
prnprs3	216.481	-2.65693	0.8623	-3.08121	0.00206158	0.0134113
nelfb	846.182	0.444437	0.144242	3.08119	0.00206174	0.0134113
asnsd1	609.754	0.547575	0.177716	3.08117	0.00206186	0.0134113
abcg2c	266.96	-0.677429	0.219907	-3.08052	0.00206641	0.0134169
wt1b	28.1382	-1.61121	0.522985	-3.0808	0.00206445	0.0134169
tmem60	168.143	1.04959	0.340707	3.08061	0.00206576	0.0134169
eaf1	362.139	0.598948	0.194639	3.07723	0.00208936	0.0135578
gnai2a	1302.58	0.420584	0.136694	3.07683	0.00209217	0.0135679
irak1bp1	135.562	-0.941161	0.305912	-3.07657	0.00209396	0.0135715
dennd4a	56.952	-1.7851	0.580262	-3.07637	0.0020954	0.0135727
daam1b	271.73	-1.25161	0.406871	-3.07618	0.00209668	0.0135729
sccpdhb	64.499	-0.960035	0.312112	-3.07593	0.00209844	0.0135762
mgst1.1	156.86	-0.811409	0.263826	-3.07554	0.00210121	0.0135861
srsf3a	2113.47	0.495526	0.161135	3.07522	0.00210348	0.0135927
znf1024	319.583	0.797197	0.259268	3.0748	0.00210643	0.0136036
slc43a2a	34.1474	-1.55457	0.505662	-3.07432	0.00210981	0.0136174
zgc:65997	13.0298	-2.4546	0.798586	-3.07368	0.00211437	0.0136321
zgc:195023	6.32365	-5.41115	1.7605	-3.07365	0.00211459	0.0136321
nog2	20.1208	2.20902	0.718816	3.07313	0.00211823	0.0136475
nbr1	72.6238	-0.976714	0.317867	-3.07271	0.00212127	0.0136555
zgc:56064	2873.99	0.394357	0.128353	3.07243	0.00212324	0.0136555
lect1	23.2183	-8.28793	2.69749	-3.07246	0.00212303	0.0136555
pvrl3b	560.173	-0.596814	0.194328	-3.07117	0.00213221	0.0137051
rnf20	1824.84	0.625003	0.203522	3.07094	0.00213384	0.0137075
zgc:194167	10.007	-2.8426	0.925739	-3.07063	0.0021361	0.0137139
zgc:91976	75.9315	-1.34396	0.437779	-3.06994	0.00214102	0.0137293
eif1axb	3101.16	0.369962	0.120504	3.07011	0.00213977	0.0137293
bmp10	13.5119	-3.48622	1.13627	-3.06812	0.00215408	0.0138049
sept7a	1235.83	0.643072	0.209649	3.06738	0.00215945	0.0138312
gata1a	10.7025	-4.23411	1.3818	-3.06419	0.00218257	0.0139546
spsb1	414.896	0.513417	0.167545	3.06436	0.0021814	0.0139546
itgav	155.681	0.749075	0.244453	3.0643	0.00218183	0.0139546
tapbp	11.1665	-2.41327	0.787616	-3.06402	0.00218386	0.0139547
slc27a4	78.6029	-1.57683	0.514677	-3.06373	0.00218597	0.0139599
spcs2	3482.88	0.422604	0.138011	3.0621	0.00219792	0.014028
helt	5.12996	-6.08308	1.98672	-3.06186	0.00219963	0.0140307
ugt5b1	22.8363	1.97386	0.64489	3.06077	0.00220768	0.0140474
sec62	445.693	0.522746	0.170797	3.06063	0.00220871	0.0140474
stau2	939.132	-0.473437	0.154666	-3.06104	0.00220571	0.0140474
fam102ab	55.8757	-1.54664	0.505229	-3.06126	0.00220406	0.0140474
cox6c	519.63	0.620408	0.202695	3.06079	0.00220754	0.0140474
mrpl48	165.725	-0.646044	0.211172	-3.05933	0.00221831	0.0141003
keap1a	15.0403	-2.52322	0.824859	-3.05897	0.00222097	0.0141089
zgc:153675	139.857	-0.884064	0.289041	-3.05861	0.00222367	0.0141169
zgc:174877	150.279	0.712645	0.233008	3.05845	0.00222482	0.0141169
ubr5	495.581	-0.807123	0.263918	-3.05824	0.00222645	0.014119
traf4a	101.682	-1.26004	0.412131	-3.05739	0.00223277	0.0141508
ptgr1	655.315	-0.422158	0.138088	-3.05717	0.0022344	0.014153
adob	177.246	-1.01342	0.331519	-3.05689	0.00223644	0.0141576
slc39a1	29.07	-1.80518	0.590682	-3.05609	0.00224244	0.0141873
casp9	70.097	-1.06864	0.349743	-3.05551	0.00224675	0.0142064
ppp6c	1645.9	0.488614	0.159952	3.05476	0.00225243	0.014234
sncga	8.65386	-4.93233	1.61538	-3.05336	0.00226295	0.0142839
cyc1	3395.26	0.483842	0.158457	3.05347	0.00226213	0.0142839
sh3bgrl	658.432	-0.825013	0.270251	-3.05276	0.00226743	0.0143039
si:dkey-60b12.1	142.371	1.0766	0.352693	3.05251	0.00226935	0.0143077
psmb3	2773.37	0.484939	0.158879	3.05226	0.00227127	0.0143115
snrpb	4595.83	-0.450204	0.147619	-3.04978	0.00229011	0.0144135
ambra1a	112.775	-1.04922	0.344022	-3.04987	0.00228942	0.0144135
dnajb2	12.5411	-2.71446	0.890144	-3.04946	0.0022925	0.0144202
surf6	1319.45	-0.461273	0.151285	-3.04904	0.00229576	0.0144324
rab3gap2	187.887	-0.819955	0.269048	-3.04762	0.00230662	0.0144923
zswim6	12.9691	-2.92821	0.961019	-3.04698	0.00231152	0.0145063
ube2d1a	594.216	0.46034	0.151074	3.04711	0.0023105	0.0145063
sema3ab	6.88708	-3.96182	1.30141	-3.04425	0.00233258	0.01463
ap1m2	38.2925	-1.35884	0.446533	-3.04309	0.0023416	0.0146782
sema6dl	389.406	0.588237	0.193364	3.04213	0.00234912	0.0147168
LOC100149066	40.3367	-5.44074	1.78903	-3.04116	0.00235666	0.0147556
tmem106c	103.114	-1.05002	0.345357	-3.04038	0.00236277	0.0147853
isoc1	369.954	-0.512296	0.168507	-3.0402	0.00236422	0.0147859
naa38	691.645	0.440664	0.144983	3.03941	0.0023704	0.014816
thumpd1	820.56	0.55694	0.18326	3.03907	0.00237312	0.0148245
msgn1	39.466	-2.56229	0.843582	-3.03739	0.00238639	0.0148989
phb	1451.46	0.365783	0.12047	3.03629	0.00239506	0.0149444
ybx1	36171.3	0.368179	0.121266	3.03612	0.00239643	0.0149444
tbc1d19	17.7666	-1.91408	0.631084	-3.033	0.00242134	0.0150911
cnksr1	99.2365	1.07022	0.353003	3.03176	0.00243129	0.0151444
mbd1b	419.003	0.543706	0.179391	3.03084	0.00243875	0.0151822
acot9.1	228.632	-0.843132	0.278206	-3.0306	0.00244065	0.0151853
ndufs7	1084.75	0.512297	0.169076	3.02999	0.00244564	0.0152077
atp6v0ca	1220.55	0.417956	0.13798	3.0291	0.0024528	0.0152435
paqr3a	448.574	0.556403	0.183726	3.02844	0.0024582	0.0152684
polb	911.806	0.558242	0.184373	3.02778	0.00246354	0.0152928
ier5	1628.11	-0.882897	0.291671	-3.02703	0.00246968	0.0153221
ppa1b	534.976	-0.564203	0.186501	-3.0252	0.00248471	0.0154066
si:ch211-255a21.1	541.498	0.652978	0.215951	3.02374	0.00249673	0.0154723
sgce	291.06	0.536798	0.177539	3.02354	0.00249833	0.0154734
ptgesl	393.448	0.516644	0.170962	3.02198	0.00251131	0.015545
alg1	209.973	0.805763	0.266718	3.02103	0.00251916	0.0155759
psmd9	551.787	0.55007	0.18208	3.02104	0.00251907	0.0155759
cldnj	295.461	0.544433	0.180295	3.01968	0.0025304	0.0156365
pcdh18a	32.5953	-2.89219	0.957968	-3.01909	0.00253538	0.0156584
zgc:194285	412.09	0.652148	0.216048	3.01853	0.00254007	0.0156784
slc4a1b	24.3813	-1.78597	0.591741	-3.01817	0.00254307	0.0156881
pqlc3	241.128	0.62173	0.206029	3.01769	0.00254711	0.0157041
chd1l	181.185	-0.624283	0.206959	-3.01646	0.00255746	0.015759
sept9b	142.85	-0.801295	0.265701	-3.01577	0.00256325	0.0157857
endog	76.9103	-0.978073	0.324346	-3.01552	0.00256536	0.0157897
zgc:158803	906.742	-0.459474	0.152395	-3.01503	0.00256952	0.0158064
supt3h	204.954	-0.679654	0.22546	-3.01452	0.00257385	0.0158241
actr2b	257.356	0.679095	0.225308	3.01407	0.00257766	0.0158385
egln3	39.9062	-2.11413	0.701552	-3.01351	0.00258248	0.0158592
actr1	1871.58	0.442282	0.14684	3.012	0.00259529	0.0159289
her3	34.8124	-3.12167	1.03709	-3.01002	0.00261229	0.0160242
adamts3	11.5572	-3.78314	1.25729	-3.00897	0.00262137	0.0160708
chfr	446.835	0.513327	0.170641	3.00823	0.00262772	0.0161007
med22	404.062	0.594108	0.197525	3.00776	0.0026318	0.0161166
bnip4	120.319	-0.803692	0.26727	-3.00704	0.00263801	0.0161456
nmt1b	214.604	0.724107	0.240858	3.00636	0.00264395	0.0161728
si:dkeyp-69e1.8	40.4765	-1.30468	0.434136	-3.00524	0.00265372	0.0162235
mtrf1	112.249	-0.827876	0.275558	-3.00436	0.00266141	0.016255
ndufa10	1703.82	0.408756	0.136057	3.00431	0.00266187	0.016255
polr2i	572.942	0.636986	0.212043	3.00404	0.00266422	0.0162603
asf1bb	407.922	-0.620563	0.206604	-3.00364	0.0026677	0.0162723
zgc:113090	4.85212	-6.01541	2.00352	-3.00242	0.00267839	0.0163284
sf3b6	1517.68	0.627492	0.209042	3.00174	0.00268438	0.0163558
sptb	32.5795	-1.88116	0.626788	-3.00127	0.00268853	0.0163719
strada	480.181	0.561294	0.18723	2.99788	0.00271864	0.016546
tspan36	71.7728	-1.32341	0.44151	-2.99746	0.00272244	0.0165598
srfb	73.5395	-1.92977	0.644115	-2.99601	0.0027354	0.0166294
si:dkey-222b8.1	653.067	-0.889103	0.296865	-2.99497	0.00274473	0.0166756
si:dkey-57a22.11	480.458	0.52527	0.175393	2.99482	0.00274607	0.0166756
cox5aa	100.481	0.874913	0.292266	2.99355	0.0027575	0.0167357
lsm12a	552.032	-0.493018	0.164749	-2.99254	0.0027667	0.0167822
pxk	110.039	-0.810131	0.27093	-2.99018	0.00278813	0.0169028
toporsa	216.409	0.629814	0.210649	2.98987	0.00279097	0.0169105
dkk1a	39.1614	1.50403	0.503128	2.98936	0.00279562	0.0169293
tnfrsf1a	93.6672	-1.68479	0.563782	-2.98838	0.00280462	0.0169744
slc43a1a	1355.89	-0.731127	0.244691	-2.98796	0.00280844	0.016988
sft2d1	283.588	-0.631474	0.211352	-2.98778	0.0028101	0.0169886
fam168a	1854.62	-0.47166	0.157879	-2.98747	0.00281295	0.0169927
slc7a8a	191.823	-0.751943	0.251708	-2.98737	0.00281389	0.0169927
si:dkey-19b23.11	128.609	0.748477	0.250595	2.9868	0.00281915	0.017015
bhlhe40	25.6742	-2.42163	0.811836	-2.9829	0.00285527	0.0172234
yap1	4782.92	-0.336466	0.112818	-2.98237	0.00286027	0.0172303
bxdc2	2861.43	0.406629	0.136353	2.98217	0.0028621	0.0172303
amdhd2	116.773	-0.778234	0.260933	-2.9825	0.00285901	0.0172303
fgfr1op2	745.591	0.421841	0.141458	2.9821	0.00286275	0.0172303
eci1	544.635	0.510076	0.171075	2.9816	0.00286749	0.0172493
psmd11b	3452.39	0.35475	0.119016	2.9807	0.0028759	0.0172904
dtymk	415.044	0.653383	0.219267	2.97985	0.00288388	0.0173288
acadm	322.001	0.52261	0.175399	2.97955	0.00288674	0.0173364
vps26a	1440.2	0.351628	0.118022	2.97934	0.00288873	0.0173388
ero1b	107.23	-0.747067	0.250816	-2.97854	0.00289625	0.01736
zgc:194989	25.4469	1.99802	0.670864	2.97829	0.00289865	0.01736
ppp1caa	3214.19	0.389831	0.130885	2.97841	0.00289747	0.01736
iscub	68.3961	-1.16894	0.392459	-2.9785	0.00289662	0.01736
irf2bp2b	480.066	-1.03776	0.348583	-2.97707	0.00291013	0.0173741
stx12	476.928	-0.456037	0.153188	-2.97697	0.00291116	0.0173741
dtnba	790.228	-0.564427	0.189565	-2.97748	0.00290628	0.0173741
wdr48a	78.4934	1.02346	0.343718	2.97761	0.00290501	0.0173741
mrpl23	474.918	-0.671345	0.225521	-2.97686	0.00291219	0.0173741
actl6a	2216.81	0.414386	0.139191	2.9771	0.00290985	0.0173741
sec24d	35.7068	-1.95341	0.656189	-2.97689	0.00291184	0.0173741
zp3.1	69.2287	1.04267	0.350297	2.97653	0.0029153	0.0173832
slc26a11	27.0599	-1.76317	0.592541	-2.97561	0.00292409	0.0174165
hmbsa	405.713	-0.512908	0.17237	-2.97563	0.00292392	0.0174165
cdv3	2628.9	0.449851	0.151297	2.97331	0.00294609	0.017538
nenf	379.516	0.538056	0.181019	2.97238	0.00295503	0.0175815
tagln3b	29.7639	-1.69986	0.571971	-2.97193	0.00295935	0.0175904
rras	2187.42	0.459164	0.154502	2.97189	0.00295976	0.0175904
nfe2l3	887.704	0.471106	0.158554	2.97126	0.00296581	0.0176168
b3gnt5b	13.7851	-3.05129	1.02722	-2.97045	0.00297367	0.0176538
rexo1	234.909	0.682958	0.229934	2.97023	0.00297578	0.0176567
zgc:173585	17.4057	2.0636	0.69497	2.96933	0.0029845	0.0176988
mta3	1875.35	0.438424	0.147669	2.96896	0.00298807	0.0177103
napab	806.558	0.436419	0.147086	2.9671	0.0030062	0.0178081
fam168b	1502.35	0.442517	0.149154	2.96684	0.00300875	0.0178135
gyg1a	79.1902	-1.21637	0.410151	-2.96566	0.00302035	0.0178725
nfil3	228.613	-1.55359	0.523965	-2.96507	0.00302613	0.0178969
LOC100149164	114.303	0.987657	0.333307	2.9632	0.00304455	0.0179571
vsx2	8.12956	-4.82821	1.6292	-2.96354	0.00304119	0.0179571
ccdc28a	171.361	0.657396	0.221837	2.96341	0.00304246	0.0179571
zgc:63733	310.746	0.705642	0.238125	2.96333	0.00304334	0.0179571
atp2a1	8.12956	-4.82821	1.6292	-2.96354	0.00304119	0.0179571
col9a3	23.9067	-3.86069	1.30325	-2.96235	0.00305297	0.017997
ogt.1	1434.5	-0.340112	0.11484	-2.96161	0.0030603	0.0180304
fbxo11a	822.319	0.524528	0.177142	2.96106	0.00306582	0.0180337
sypl2b	215.981	-0.708974	0.239432	-2.96106	0.00306582	0.0180337
hspe1	690.996	-0.576143	0.194556	-2.96132	0.00306325	0.0180337
ptbp2a	253.81	0.645356	0.217961	2.96088	0.00306758	0.0180343
unc50	332.412	0.574022	0.19389	2.96056	0.0030708	0.0180435
mark3a	811	-0.673514	0.227574	-2.95954	0.00308096	0.0180934
tmbim1	17.6404	-2.21203	0.747751	-2.95824	0.00309402	0.0181603
bmb	173.276	1.04756	0.354289	2.95678	0.00310871	0.0182367
fbxl16	10.3881	-3.54848	1.20047	-2.95592	0.0031174	0.0182778
kctd2	84.0464	1.36705	0.462953	2.95288	0.00314822	0.0184474
si:ch211-39k3.2	37.0226	1.47423	0.499277	2.95274	0.00314972	0.0184474
hmgb1b	6963.83	0.467094	0.158215	2.95228	0.00315433	0.0184645
clk2b	597.371	0.4947	0.167646	2.95087	0.00316883	0.0185394
crip1	19.757	-2.33306	0.790753	-2.95043	0.00317332	0.018555
pmpca	740.766	0.461433	0.156403	2.95027	0.00317492	0.018555
b4galt7	403.515	0.638202	0.216385	2.94938	0.00318415	0.018597
pfas	503.176	-0.974586	0.330453	-2.94924	0.00318551	0.018597
dcxr	82.1697	0.863827	0.292929	2.94893	0.0031888	0.0186061
plod1a	520.782	-0.642436	0.217938	-2.94779	0.00320057	0.0186648
tmem184ba	1028.84	0.417878	0.14179	2.94716	0.00320708	0.0186928
nprl3	186.812	0.613162	0.208064	2.94699	0.00320887	0.0186932
dmrt1	10.892	-3.35296	1.13814	-2.94601	0.00321899	0.0187422
tlx1	13.3703	-3.68069	1.24957	-2.94557	0.00322362	0.0187591
melk	626.27	0.475907	0.161587	2.94521	0.0032273	0.0187705
tfdp1a	1876.72	0.396601	0.134687	2.94462	0.00323349	0.0187964
dio1	11.5374	-2.89837	0.98437	-2.94439	0.00323595	0.0188006
bms1	2700.19	-0.366123	0.124391	-2.94333	0.00324701	0.018851
dhrs1	144.325	0.879612	0.298859	2.94323	0.00324808	0.018851
cbx6a	889.687	0.554003	0.188274	2.94254	0.00325536	0.0188832
aph1b	1399.62	0.508568	0.17287	2.94191	0.00326196	0.0189114
znf362b	182.401	0.805204	0.273868	2.94012	0.00328084	0.0190107
psenen	396.954	0.567316	0.193044	2.93879	0.00329497	0.0190824
pou6f1	125.318	-0.891992	0.303576	-2.93828	0.00330041	0.0191038
nudcd2	725.561	0.470857	0.160302	2.93732	0.00331065	0.0191325
gria1a	6.21151	-4.41994	1.5047	-2.93741	0.00330963	0.0191325
lyrm4	279.85	0.619617	0.210939	2.93742	0.00330956	0.0191325
fbxl2	18.3485	-2.49461	0.849638	-2.93608	0.00332384	0.0191883
fam195b	668.244	0.435649	0.148378	2.93609	0.00332383	0.0191883
MGC174152	233.255	-7.78091	2.65341	-2.93242	0.0033633	0.0193928
tet3	30.6795	-2.17892	0.743076	-2.9323	0.00336461	0.0193928
neurod1	18.5636	-4.69514	1.60109	-2.93246	0.00336289	0.0193928
chd	24.1544	-2.70118	0.921678	-2.93072	0.00338174	0.0194813
tspan14	997.53	0.419918	0.143305	2.93024	0.00338698	0.0195011
max	2716.79	0.430338	0.146889	2.92968	0.00339307	0.0195259
trit1	270.844	-0.56822	0.193971	-2.92941	0.00339609	0.0195329
si:dkeyp-89c11.2	3054.59	-0.440029	0.150272	-2.92822	0.0034091	0.0195973
dnaja3a	103.684	-0.858535	0.293357	-2.92659	0.00342699	0.0196898
tmem160	70.6161	1.04579	0.35739	2.92619	0.00343144	0.019705
fam213aa	511.297	0.471925	0.161451	2.92302	0.00346652	0.0198959
rmi1	92.5996	-0.886538	0.30333	-2.92268	0.00347029	0.019907
arid4b	880.39	-0.563975	0.192979	-2.92247	0.00347265	0.0199101
zgc:92873	211.038	0.711211	0.243381	2.92222	0.00347549	0.0199159
csnk2a2a	519.036	0.497346	0.170271	2.92091	0.00349006	0.0199889
nkap	1367.18	0.437281	0.149804	2.91903	0.00351126	0.0200997
klf6a	2333.51	-0.90988	0.311953	-2.91673	0.00353727	0.0202379
cldni	131.285	-3.2676	1.12039	-2.9165	0.00353985	0.0202421
si:dkey-75a21.2	330.059	0.554724	0.190216	2.91628	0.00354228	0.0202453
zc3hc1	1903.51	0.436923	0.149853	2.91567	0.0035493	0.0202748
epha7	749.348	-0.808168	0.277207	-2.91539	0.00355241	0.0202819
srsf2b	420.591	0.547659	0.187868	2.91512	0.00355548	0.0202888
hspa4a	989.886	-0.493226	0.169225	-2.91461	0.00356133	0.0203115
znf292a	461.568	0.884665	0.303601	2.9139	0.00356939	0.0203469
zgc:173652	43.7567	1.17475	0.40318	2.91372	0.00357155	0.0203485
arpc5a	2344.61	0.313972	0.107803	2.91247	0.00358588	0.0204194
noto	10.8629	-3.59993	1.23658	-2.9112	0.00360044	0.0204916
neurl2	9.84076	-2.98318	1.02494	-2.91059	0.00360746	0.0205209
pax4	6.04793	-4.38355	1.50716	-2.90848	0.00363196	0.0206494
ddx39aa	8656.4	0.409472	0.140861	2.90691	0.00365014	0.0207311
ppcdc	49.2471	1.07677	0.370408	2.90698	0.00364933	0.0207311
sec61g	381.4	0.625411	0.215227	2.90581	0.00366298	0.0207853
slc6a13l	6.10311	-3.36981	1.1597	-2.90577	0.0036635	0.0207853
sgk2a	11.2027	-2.67462	0.920733	-2.90488	0.00367389	0.0208334
pdgfaa	48.2208	-2.35354	0.810366	-2.9043	0.00368079	0.0208616
tfr1b	43.1229	-1.33116	0.4585	-2.9033	0.0036925	0.0209171
pdzrn3b	791.099	-0.537787	0.185265	-2.9028	0.00369841	0.0209288
si:dkeyp-110g5.4	90.8931	0.871625	0.300254	2.90296	0.00369654	0.0209288
si:dkey-29d8.3	50.6209	-1.06312	0.366341	-2.902	0.00370793	0.0209718
dok1b	28.3296	-2.59668	0.894944	-2.9015	0.00371383	0.0209942
plekhg7	19.5569	-1.66705	0.574705	-2.9007	0.00372328	0.0210367
ndufs3	937.634	0.417824	0.144154	2.89846	0.00374999	0.0211766
elp6	322.357	0.589998	0.203651	2.8971	0.0037663	0.0212577
lsm14aa	290.512	0.673507	0.232601	2.89555	0.00378498	0.0213402
rsrc2	620.557	0.41243	0.142436	2.89555	0.00378494	0.0213402
tmem41aa	51.5818	-1.06898	0.3692	-2.8954	0.0037868	0.0213402
tnfsf10l	67.869	-1.168	0.403581	-2.89408	0.00380272	0.0214189
hoxc4a	17.712	-1.86499	0.644512	-2.89365	0.00380796	0.0214373
dclk2a	77.9278	1.21218	0.419019	2.8929	0.00381706	0.0214774
kpna5	528.917	0.488678	0.168969	2.89212	0.00382652	0.0215041
acat2	313.858	0.880044	0.304301	2.89202	0.00382774	0.0215041
taf1	722.668	0.551513	0.190687	2.89224	0.00382506	0.0215041
pef1	809.87	0.512302	0.177182	2.89138	0.00383548	0.0215365
zfp36l1a	2934.82	-1.659	0.573884	-2.89082	0.00384233	0.0215638
asb7	126.114	0.948969	0.328307	2.89049	0.00384636	0.0215753
cyp2y3	79.5817	-1.25412	0.433918	-2.89021	0.00384979	0.0215834
appbp2	1444.84	0.346238	0.11987	2.88845	0.0038714	0.0216934
rhbdd1	37.2887	-1.91706	0.663779	-2.88811	0.0038757	0.0217063
insb	37.3203	1.81491	0.62854	2.88751	0.00388306	0.0217364
hcfc1a	3490.52	-0.559774	0.193926	-2.88654	0.00389508	0.0217924
vax1	6.16802	-6.35789	2.20278	-2.8863	0.00389801	0.0217976
otx1b	75.4562	-2.43166	0.842575	-2.88598	0.00390196	0.0218062
zgc:92140	43.2277	-1.37282	0.475708	-2.88585	0.00390356	0.0218062
bcor	39.1432	1.47049	0.509584	2.88567	0.00390584	0.0218078
atp5ib	685.004	0.498918	0.172917	2.88531	0.00391031	0.0218203
nasp	2291.5	0.36639	0.126991	2.88516	0.00391209	0.0218203
mis12	543.702	0.424844	0.147308	2.88405	0.00392598	0.0218865
cblc	5.41115	-5.17182	1.7939	-2.883	0.00393909	0.0219388
sub1b	563.914	0.477379	0.165602	2.88269	0.00394293	0.0219388
ccnb1	1624.81	0.58765	0.203845	2.88282	0.00394129	0.0219388
arl6ip4	380.469	-0.49577	0.171984	-2.88265	0.00394342	0.0219388
rraga	519.028	-0.5647	0.195921	-2.88229	0.00394802	0.0219532
sfxn3	59.6844	1.48137	0.514084	2.88157	0.00395696	0.0219804
nxph1	5.12179	-5.10397	1.77115	-2.88173	0.003955	0.0219804
riok2	1063.8	0.395638	0.137311	2.88132	0.00396016	0.021987
myef2	6174.24	0.350877	0.121821	2.88028	0.00397326	0.0220484
dachd	18.0679	-1.99522	0.692766	-2.88007	0.00397581	0.0220513
cfap58	6.03289	-6.33373	2.19976	-2.87928	0.0039858	0.0220955
btr02	59.3543	-1.67976	0.583561	-2.87846	0.00399619	0.0221418
ppp4r2b	689.934	0.407307	0.141522	2.87805	0.00400147	0.0221598
uqcc1	422.951	-0.512488	0.17812	-2.8772	0.00401221	0.0222079
sall4	1167.86	-0.672093	0.233623	-2.87683	0.00401689	0.0222226
med19b	191.748	0.636283	0.221195	2.87658	0.00402013	0.0222292
si:dkeyp-120h9.1	541.989	-0.542523	0.188709	-2.87492	0.00404134	0.0223351
phlda2	83.103	-1.99068	0.692578	-2.87431	0.0040491	0.0223667
slc4a2a	90.4992	1.01118	0.351825	2.87409	0.00405192	0.0223693
zgc:56525	1421.76	0.435479	0.151526	2.87395	0.0040537	0.0223693
si:ch211-212o1.2	35.2855	-1.36087	0.473574	-2.87362	0.00405798	0.0223816
atp5l	1186.71	0.466977	0.162535	2.87309	0.00406484	0.0224081
fam73a	1079.18	0.421069	0.146609	2.87205	0.00407812	0.0224699
psph	610.704	0.49427	0.172128	2.87153	0.0040849	0.0224959
pappab	9.89308	-3.78986	1.32024	-2.87059	0.004097	0.0225511
tnip1	101.994	0.927402	0.323176	2.86964	0.00410933	0.0226075
pcnp	492.946	0.593191	0.206729	2.86941	0.00411236	0.0226128
socs6b	838.575	0.39942	0.139234	2.86869	0.00412177	0.0226233
txn2	490.559	0.490114	0.170853	2.86862	0.00412261	0.0226233
nrf1	445.958	-0.649551	0.226436	-2.86858	0.00412318	0.0226233
lamb1b	13.1355	-2.4558	0.856138	-2.86847	0.00412466	0.0226233
tpma	104.71	-5.2105	1.81629	-2.86875	0.00412094	0.0226233
ceacam1	70.7576	-8.93151	3.1147	-2.86753	0.00413688	0.0226744
pigm	58.4284	-0.971139	0.338679	-2.86743	0.00413815	0.0226744
smc2	2338.31	0.375382	0.130928	2.86708	0.00414275	0.0226768
unc119.1	208.966	0.653744	0.228006	2.86722	0.00414093	0.0226768
arglu1a	361.351	0.558145	0.194689	2.86685	0.00414578	0.0226819
bmper	1730.24	0.509974	0.177925	2.86623	0.00415391	0.022715
sec63	1979.82	0.506161	0.176642	2.86547	0.00416395	0.0227471
cebpb	139.916	-3.99491	1.39411	-2.86556	0.00416278	0.0227471
marcksl1a	368.184	-0.714658	0.249476	-2.86463	0.00417491	0.0227955
lsm4	815.571	0.423773	0.147968	2.86394	0.00418407	0.022834
fzd8b	60.5183	-2.43659	0.851013	-2.86316	0.00419434	0.0228727
acp2	97.4603	-0.93079	0.3251	-2.86309	0.00419535	0.0228727
gfi1aa	11.7063	-4.03493	1.40963	-2.8624	0.00420451	0.0229111
dph5	179.447	-0.577598	0.201867	-2.86127	0.00421942	0.0229809
sssca1	354.187	0.582186	0.203506	2.86078	0.00422595	0.0229898
[truncated: 12,792 more rows]
